# Supplementary material
Source: bioRxiv or medRxiv preprint supplement (https://www.biorxiv.org/content/biorxiv/early/2020/06/16/2020.06.15.153080/DC1/embed/media-1.pdf)
Supplement: Supplementary file [file media-1.pdf]

## Supplementary Materials for

# Improving oligo-conjugated antibody signal in multimodal single-cell analysis

Terkild Brink Buus<sup>1,2</sup>, Alberto Herrera<sup>1</sup>, Ellie Ivanova<sup>1</sup>, Eleni Mimitou<sup>3</sup>, Anthony Cheng<sup>4,5</sup>, Thales Papagiannakopoulos<sup>1</sup>, Peter Smibert<sup>3</sup>, Niels Ødum<sup>2</sup>, & Sergei B. Koralov<sup>1</sup>

<sup>1</sup>Department of Pathology, New York University School of Medicine, New York, NY, USA.

<sup>2</sup>LEO Foundation Skin Immunology Research Center, Department of Immunology & Microbiology, University of Copenhagen, Copenhagen, Denmark.

<sup>3</sup>Technology Innovation Lab, New York Genome Center, New York, NY, USA.

<sup>4</sup>Department of Genetic and Genome Sciences, University of Connecticut School of Medicine, Farmington, CT, USA.

<sup>5</sup>Department of Biostatistics and Epidemiology, School of Public Health and Health Sciences, University of Massachusetts, Amherst, MA, USA.

|                                                                                 |    |
|---------------------------------------------------------------------------------|----|
| Supplementary Table S1: Oligo-conjugated antibody panel for 5'-CITE-seq .....   | 2  |
| Supplementary Table S2: Five categories of response to four-fold dilution ..... | 3  |
| Supplementary Figure S1.....                                                    | 4  |
| Supplementary Figure S2A: Category A.....                                       | 6  |
| Supplementary Figure S2B: Category B.....                                       | 7  |
| Supplementary Figure S2C: Category C.....                                       | 8  |
| Supplementary Figure S2D: Category D .....                                      | 9  |
| Supplementary Figure S2E: Category E .....                                      | 9  |
| Supplementary Figure S3A .....                                                  | 11 |
| Supplementary Figure S3B .....                                                  | 12 |
| Supplementary Figure S4A .....                                                  | 13 |
| Supplementary Figure S4B .....                                                  | 14 |
| Supplementary Figure S5.....                                                    | 15 |
| Supplementary Figure S6.....                                                    | 16 |
| Supplementary Figure S7.....                                                    | 17 |
| Supplementary Figure S8A .....                                                  | 18 |
| Supplementary Figure S8B .....                                                  | 19 |
| Supplementary Figure S9.....                                                    | 20 |

Supplementary Table S1: Oligo-conjugated antibody panel for 5'-CITE-seq

| Marker   | Alias          | Clone     | Isotype (Mouse) | Vendor    | TotalSeq C Tag | Cat#   | DF1 conc. (µg/ml) | DF4 conc. (µg/ml) | Optimized conc. (µg/ml) | Optimized conc. (DF1 fold change ) |
|----------|----------------|-----------|-----------------|-----------|----------------|--------|-------------------|-------------------|-------------------------|------------------------------------|
| CD44     |                | BJ18      | IgG1            | BioLegend | 0125           | 338827 | 0.050             | 0.013             | 0.025                   | 2.00                               |
| CD2      |                | TS1/8     | IgG1            | BioLegend | 0367           | 309231 | 0.100             | 0.025             | 0.100                   | 1.00                               |
| CD31     | PECAM-1        | WM59      | IgG1            | BioLegend | 0124           | 303139 | 0.100             | 0.025             | 0.100                   | 1.00                               |
| CD45     |                | HI30      | IgG1            | BioLegend | 0391           | 304068 | 0.100             | 0.025             | 0.100                   | 1.00                               |
| CD123    |                | 6H6       | IgG1            | BioLegend | 0064           | 306045 | 0.500             | 0.125             | 0.500                   | 1.00                               |
| CD3      |                | UCHT1     | IgG1            | BioLegend | 0034           | 300479 | 0.500             | 0.125             | 0.500                   | 1.00                               |
| CD1c     |                | L161      | IgG1            | BioLegend | 0160           | 331547 | 0.500             | 0.125             | 1.000                   | 0.50                               |
| EpCAM    |                | 9C4       | IgG2b           | BioLegend | 0123           | 324247 | 0.625             | 0.156             | 0.063                   | 10.00                              |
| CD8      |                | RPA-T8    | IgG1            | BioLegend | 0080           | 301071 | 0.625             | 0.156             | 0.078                   | 8.00                               |
| CD11b    |                | ICRF44    | IgG1            | BioLegend | 0161           | 301359 | 0.625             | 0.156             | 0.125                   | 5.00                               |
| CD5      |                | UCHT2     | IgG1            | BioLegend | 0138           | 300637 | 0.625             | 0.156             | 0.156                   | 4.00                               |
| CD69     |                | FN50      | IgG1            | BioLegend | 0146           | 310951 | 0.625             | 0.156             | 0.156                   | 4.00                               |
| CD39     |                | A1        | IgG1            | BioLegend | 0176           | 328237 | 0.625             | 0.156             | 0.625                   | 1.00                               |
| CD45RA   |                | HI100     | IgG2b           | BioLegend | 0063           | 304163 | 0.625             | 0.156             | 0.625                   | 1.00                               |
| CD70     |                | 113-16    | IgG1            | BioLegend | 0027           | 355119 | 0.625             | 0.156             | 1.250                   | 0.50                               |
| CD196    | CCR6           | G034E3    | IgG2b           | BioLegend | 0143           | 353440 | 0.625             | 0.156             | 3.125                   | 0.20                               |
| CD19     |                | H1B19     | IgG1            | BioLegend | 0050           | 302265 | 1.000             | 0.250             | 0.100                   | 10.00                              |
| HLA-ABC  |                | W6/32     | IgG2a           | BioLegend | 0058           | 311449 | 1.000             | 0.250             | 0.125                   | 8.00                               |
| CD4      |                | RPA-T4    | IgG1            | BioLegend | 0072           | 300567 | 1.000             | 0.250             | 0.500                   | 2.00                               |
| CD14     |                | M5E2      | IgG2a           | BioLegend | 0081           | 301859 | 1.000             | 0.250             | 2.000                   | 0.50                               |
| CD66b    |                | 6/40c     | IgG1            | BioLegend | 0166           | 392909 | 1.000             | 0.250             | 2.000                   | 0.50                               |
| CD223    |                | 11C3C65   | IgG1            | BioLegend | 0152           | 369335 | 1.000             | 0.250             | 4.000                   | 0.25                               |
| CD56     |                | 5.1H11    | IgG1            | BioLegend | 0047           | 362559 | 1.000             | 0.250             | 4.000                   | 0.25                               |
| CD103    |                | BerACT8   | IgG1            | BioLegend | 0145           | 350233 | 1.250             | 0.313             | 0.125                   | 10.00                              |
| CD62L    |                | DREG-56   | IgG1            | BioLegend | 0147           | 304851 | 1.250             | 0.313             | 0.125                   | 10.00                              |
| TCRab    |                | IP26      | IgG1            | BioLegend | 0224           | 306743 | 1.250             | 0.313             | 0.625                   | 2.00                               |
| CD194    | CCR4           | L291H4    | IgG1            | BioLegend | 0071           | 359425 | 1.250             | 0.313             | 1.250                   | 1.00                               |
| CD26     | DPP4           | BA5b      | IgG2a           | BioLegend | 0396           | 302722 | 1.250             | 0.313             | 1.250                   | 1.00                               |
| CD274    | B7-H1 (PD-L1)  | 29E.2A3   | IgG2a           | BioLegend | 0007           | 329751 | 1.250             | 0.313             | 1.250                   | 1.00                               |
| CD28     |                | CD28.2    | IgG1            | BioLegend | 0386           | 302963 | 1.250             | 0.313             | 1.250                   | 1.00                               |
| CD127    | IL7Ralpha      | A019D5    | IgG1            | BioLegend | 0390           | 351356 | 1.250             | 0.313             | 2.500                   | 0.50                               |
| CD141    | Thrombomodulin | M80       | IgG1            | BioLegend | 0163           | 344125 | 1.250             | 0.313             | 2.500                   | 0.50                               |
| CD25     |                | BC96      | IgG1            | BioLegend | 0085           | 302649 | 1.250             | 0.313             | 2.500                   | 0.50                               |
| CD45RO   |                | UCHL1     | IgG2a           | BioLegend | 0087           | 304259 | 1.250             | 0.313             | 2.500                   | 0.50                               |
| CD80     | B7-1           | 2D10      | IgG1            | BioLegend | 0005           | 305243 | 1.250             | 0.313             | 2.500                   | 0.50                               |
| HLA-DR   |                | L243      | IgG2a           | BioLegend | 0159           | 307663 | 1.650             | 0.413             | 0.330                   | 5.00                               |
| CD117    | C-kit          | 104D2     | IgG1            | BioLegend | 0061           | 313243 | 2.500             | 0.625             | 0.625                   | 4.00                               |
| IsoIgG1  |                | MOPC-21   |                 | BioLegend | 0090           | 400187 | 2.500             | 0.625             | 1.000                   | 2.50                               |
| IsoIgG2A |                | MOPC-173  |                 | BioLegend | 0091           | 400293 | 2.500             | 0.625             | 1.000                   | 2.50                               |
| CD107a   | LAMP1          | H4A3      | IgG1            | BioLegend | 0155           | 328649 | 2.500             | 0.625             | 2.500                   | 1.00                               |
| CD366    |                | F38-2E2   | IgG1            | BioLegend | 0169           | 345049 | 2.500             | 0.625             | 2.500                   | 1.00                               |
| CD138    |                | DL-101    | IgG1            | BioLegend | 0831           | 352327 | 3.000             | 0.750             | 3.000                   | 1.00                               |
| CD24     |                | ML5       | IgG2a           | BioLegend | 0180           | 311143 | 3.300             | 0.825             | 3.300                   | 1.00                               |
| CD134    | OX40           | Ber-ACT35 | IgG1            | BioLegend | 0158           | 350035 | 5.000             | 1.250             | 1.000                   | 5.00                               |
| CD1a     |                | HI149     | IgG1            | BioLegend | 0402           | 300135 | 5.000             | 1.250             | 1.000                   | 5.00                               |
| CD279    | PD-1           | EH12.2H7  | IgG1            | BioLegend | 0088           | 329963 | 5.000             | 1.250             | 1.000                   | 5.00                               |
| CD30     |                | BY88      | IgG1            | BioLegend | 0028           | 333919 | 5.000             | 1.250             | 1.000                   | 5.00                               |
| CD183    | CXCR3          | G025H7    | IgG1            | BioLegend | 0140           | 353747 | 10.000            | 2.500             | 0.500                   | 20.00                              |
| TCRgd    |                | B1        | IgG1            | BioLegend | 0139           | 331231 | 10.000            | 2.500             | 0.500                   | 20.00                              |
| CD86     | B7-2           | IT2.2     | IgG2b           | BioLegend | 0006           | 305447 | 10.000            | 2.500             | 0.667                   | 15.00                              |
| CD152    | CTLA4          | BNI3      | IgG2a           | BioLegend | 0151           | 369621 | 10.000            | 2.500             | 1.000                   | 10.00                              |
| CD197    | CCR7           | G043H7    | IgG2a           | BioLegend | 0148           | 353251 | 10.000            | 2.500             | 1.000                   | 10.00                              |

Supplementary Table S2: Five categories of response to four-fold dilution

| Category                       | Response to 4-fold dilution                                                                                                                                                                     | Markers                                                                                              | Considerations                                                                                                                                                                                                                                                                                                                                           |
|--------------------------------|-------------------------------------------------------------------------------------------------------------------------------------------------------------------------------------------------|------------------------------------------------------------------------------------------------------|----------------------------------------------------------------------------------------------------------------------------------------------------------------------------------------------------------------------------------------------------------------------------------------------------------------------------------------------------------|
| <b>Category A</b><br>(Fig. 2A) | Antibodies where the positive signal is full saturated (without response to four-fold dilution), absent, or obscured within high background signal and do not respond to dilution.              | <i>CD1a, CD30, CD86, CD134, CD138, CD152, CD183, CD197, CD279, CD336, IgG1, IgG2A and TCRgd</i>      | Reducing antibody concentration is always the right choice. These antibodies sequester a large amount of UMIs without any biological information. Reducing concentration may reveal a true positive population obscured by the background signal.                                                                                                        |
| <b>Category B</b><br>(Fig. 2B) | Antibodies that respond by a reduction in signal but without hampering the ability to distinguish positive and negative fractions.                                                              | <i>CD4, CD5, CD8, CD11b, CD19, CD62L, CD69, CD103, CD107a, CD194, CD274, EpCAM, HLA-DR and TCRab</i> | Reducing antibody concentrations will be economically beneficial with minimal loss of biological information. For instance, In the Lung at DF1, HLA-DR uses 9% of the total UMI counts within cell-containing droplets and can be reduced at least four-fold without any apparent change in ability to discriminate between positive and negative cells. |
| <b>Category C</b><br>(Fig. 2C) | Antibodies that respond by a reduction in both signal and changes the ability to distinguish positive from negative cells or bring the cutoff value for positive cells down to only a few UMIs. | <i>CD1c, CD2, CD3, CD14, CD25, CD26, CD28, CD31, CD39, CD45RA, CD45RO, CD141,</i>                    | Reducing antibody concentration will reduce biological information as cells expressing the targeted epitopes may not exhibit sufficient signal. If only cells expressing high levels of the marker need to exhibit signal, these can be slightly reduced.                                                                                                |
| <b>Category D</b><br>(Fig. 2D) | Antibodies targeting (almost) ubiquitously expressed markers.                                                                                                                                   | <i>CD44, CD45 and HLA-ABC</i>                                                                        | These can be reduced if all cells exhibit high UMI counts. Unless these markers have a clear purpose, most experiments will benefit from dropping them from the panel as they tend to sequester a large proportion of total sequencing reads with little biological information.                                                                         |
| <b>Category E</b><br>(Fig. 2E) | Antibodies that do not show a convincing positive population due to either lack of epitopes (no positive cells in either tissue) or lack of antibody binding (non-functional antibody).         | <i>CD24, CD56, CD66b, CD70, CD80, CD117, CD123, CD127, CD196 and CD223</i>                           | Should be evaluated individually. Do you have prior information indicating that this marker is expressed by cells in these types of samples? Do any cells in the sample express high levels of the gene encoding the targeted protein? If so, increasing the concentration of the antibody or trying a different clone may yield better signal.          |

# Supplementary Figure S1

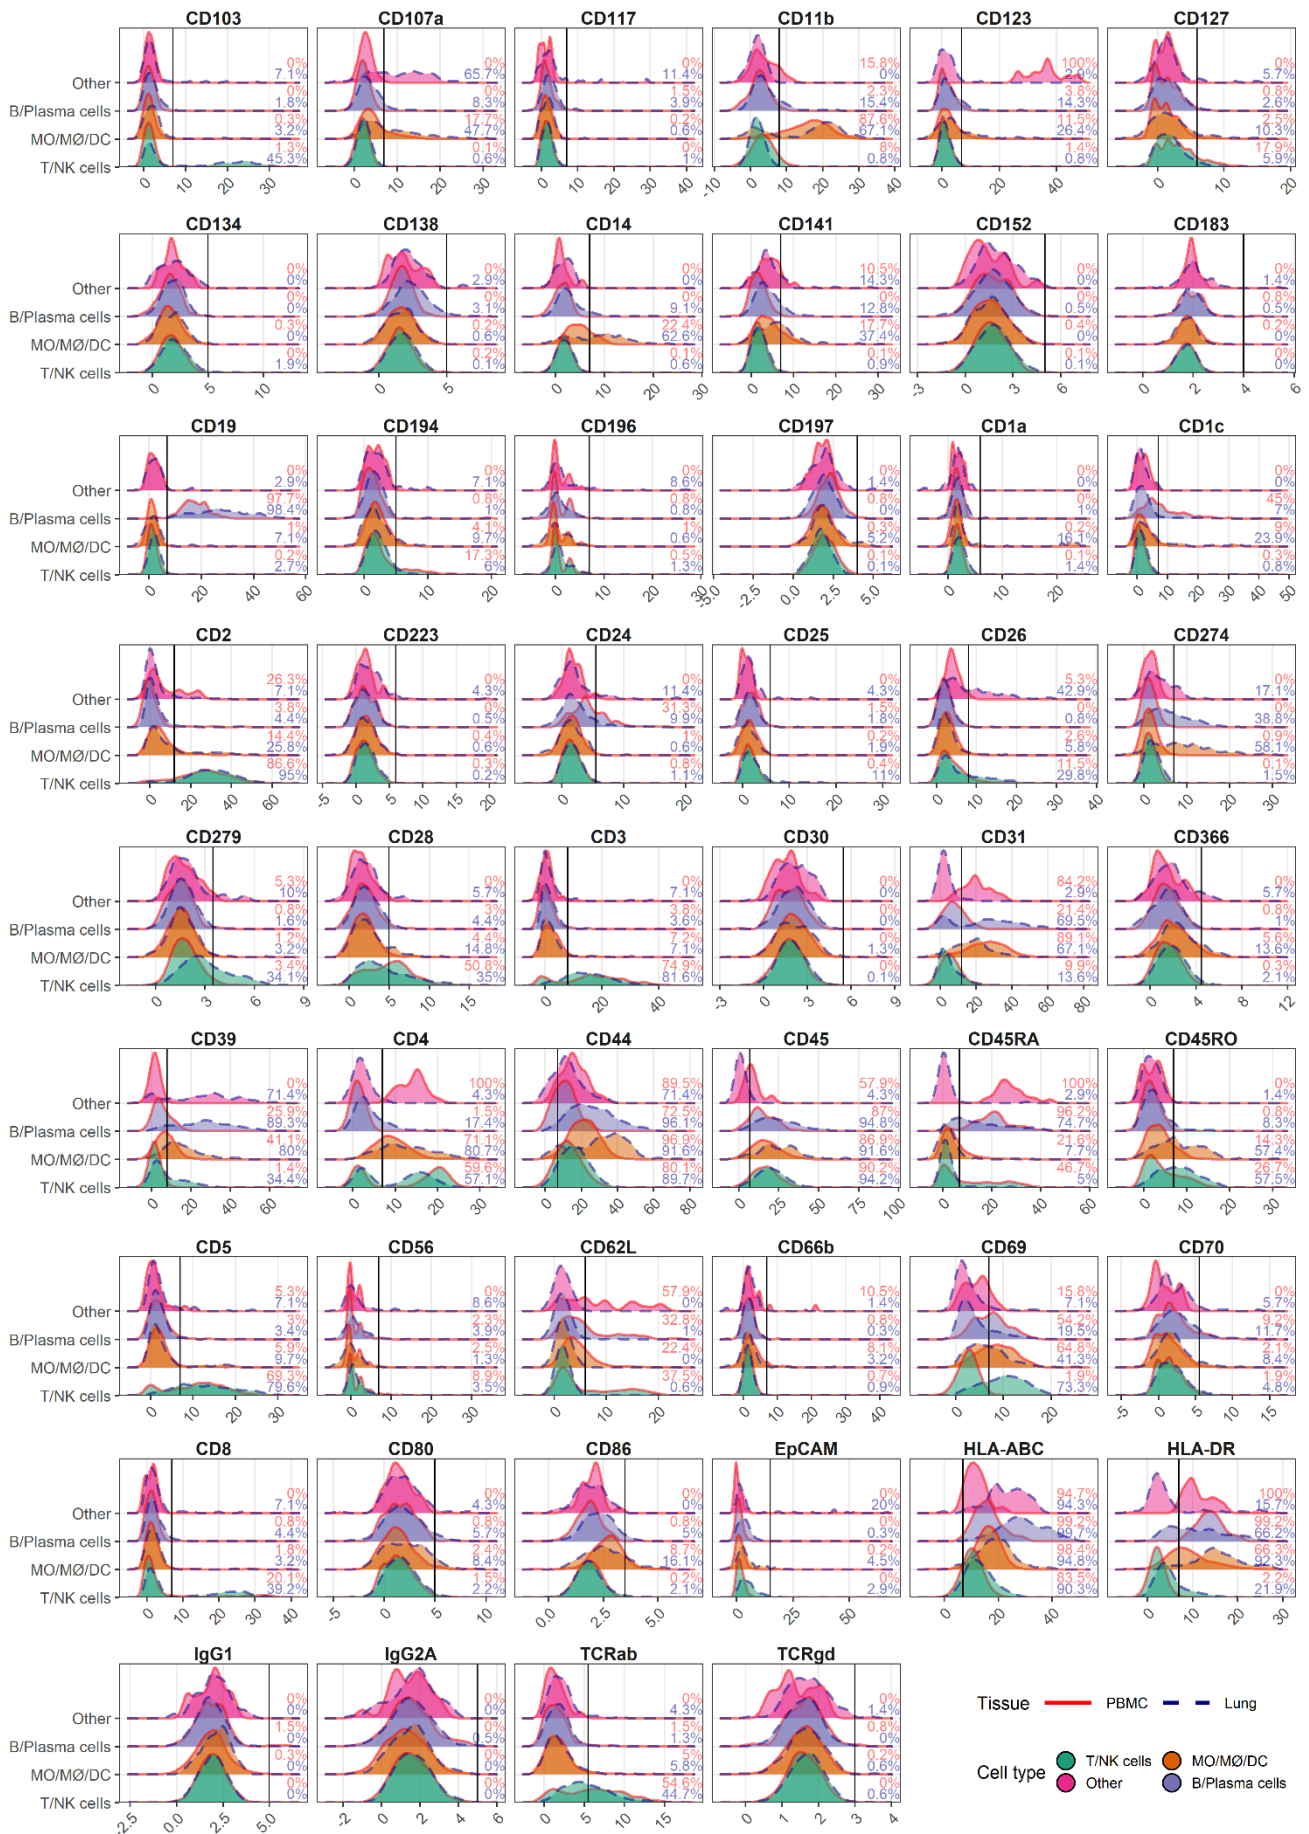

**Supplementary Figure S1: Gating positive cells based on ADT signal at dilution factor 1 (DF1).**

Histograms for normalized ADT expression of each marker within major cell types in PBMC (red) and Lung (blue). Gating threshold indicated by vertical line and numbers denote percent positive within each cell type of each tissue. MO/MØ/DC: monocyte, macrophage or dendritic cell.

# Supplementary Figure S2A: Category A

■ T/NK cells ■ MO/MØ/DC ■ B/Plasma cells ■ Other

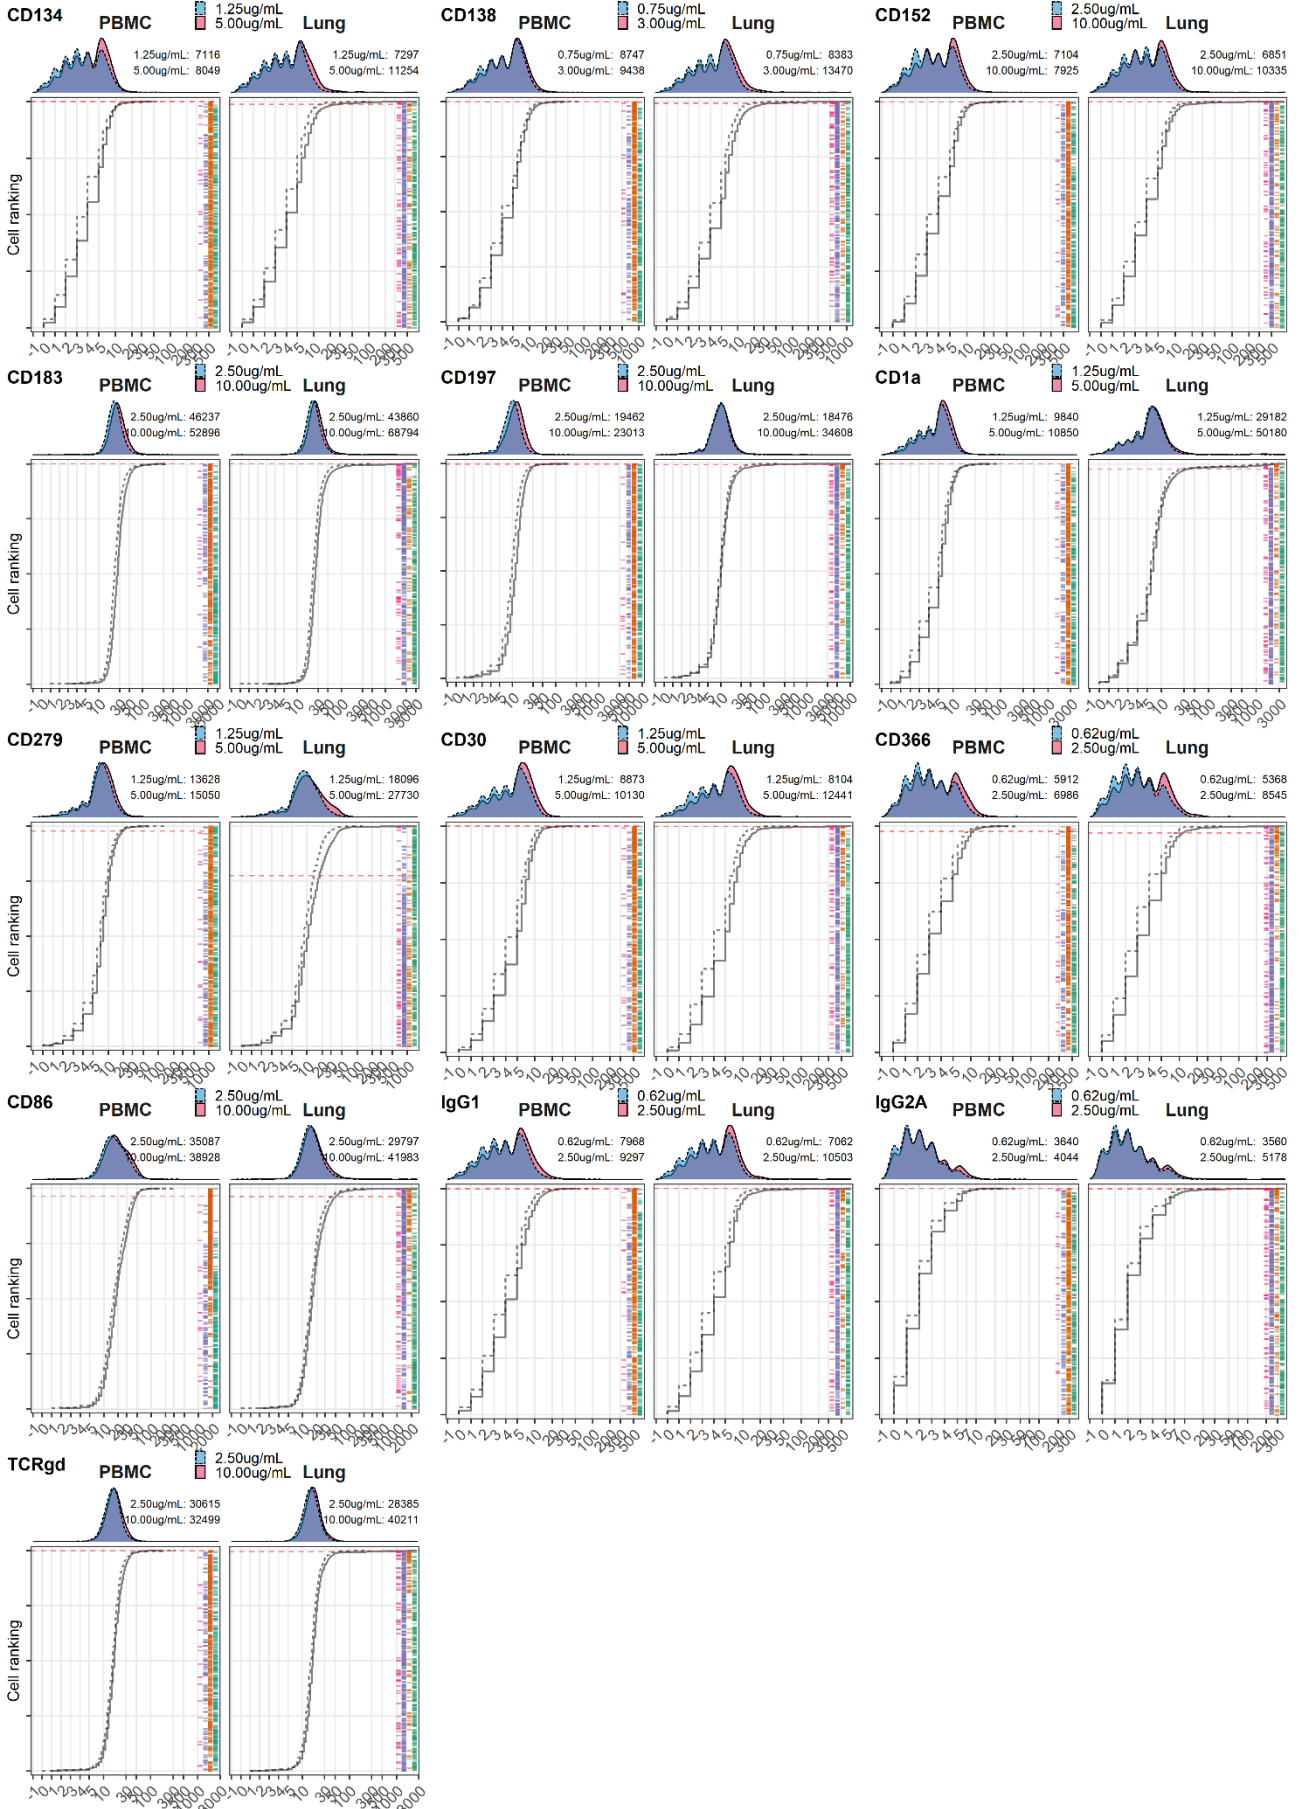



# Supplementary Figure S2B: Category B

T/NK cells MO/MØ/DC B/Plasma cells Other

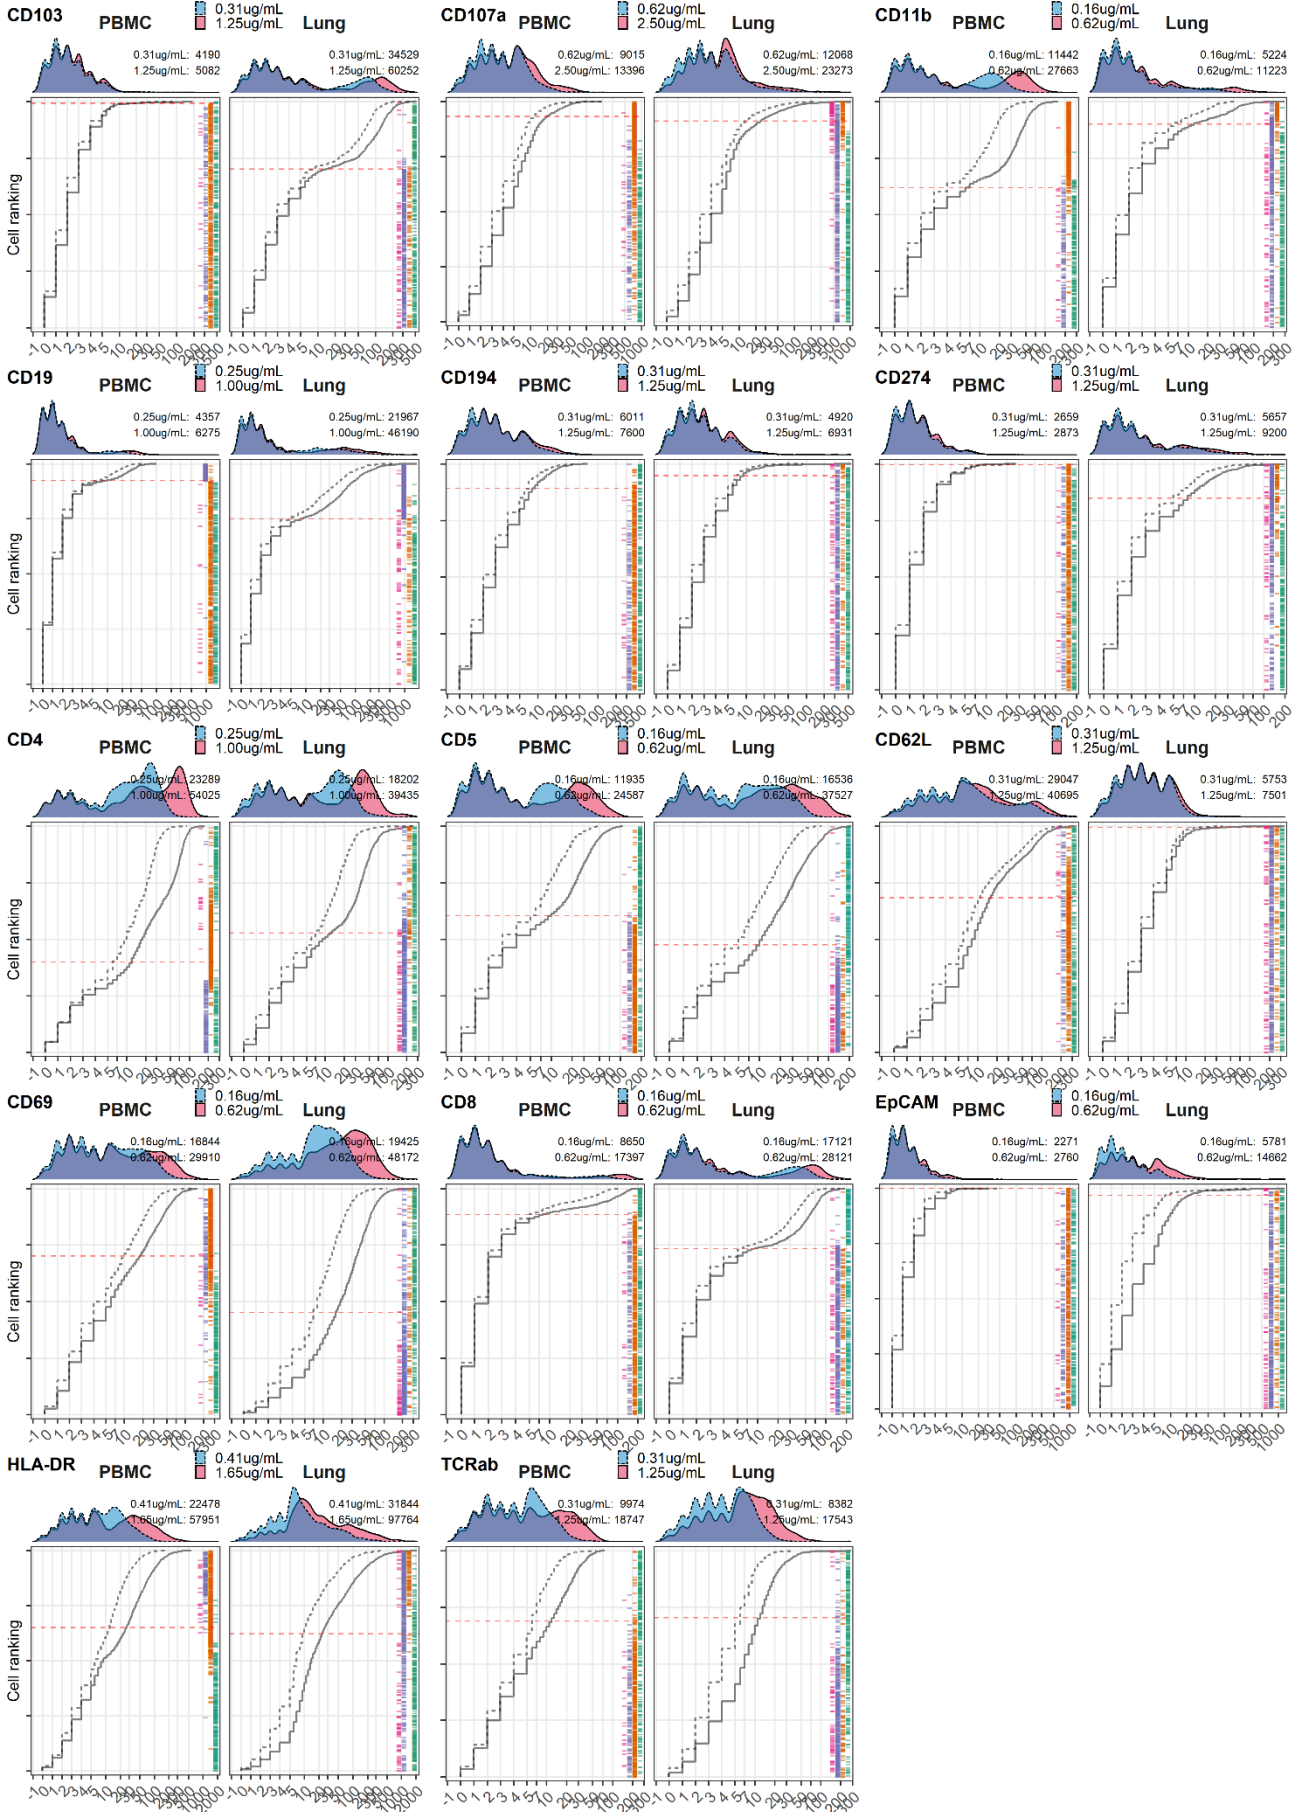

# Supplementary Figure S2C: Category C

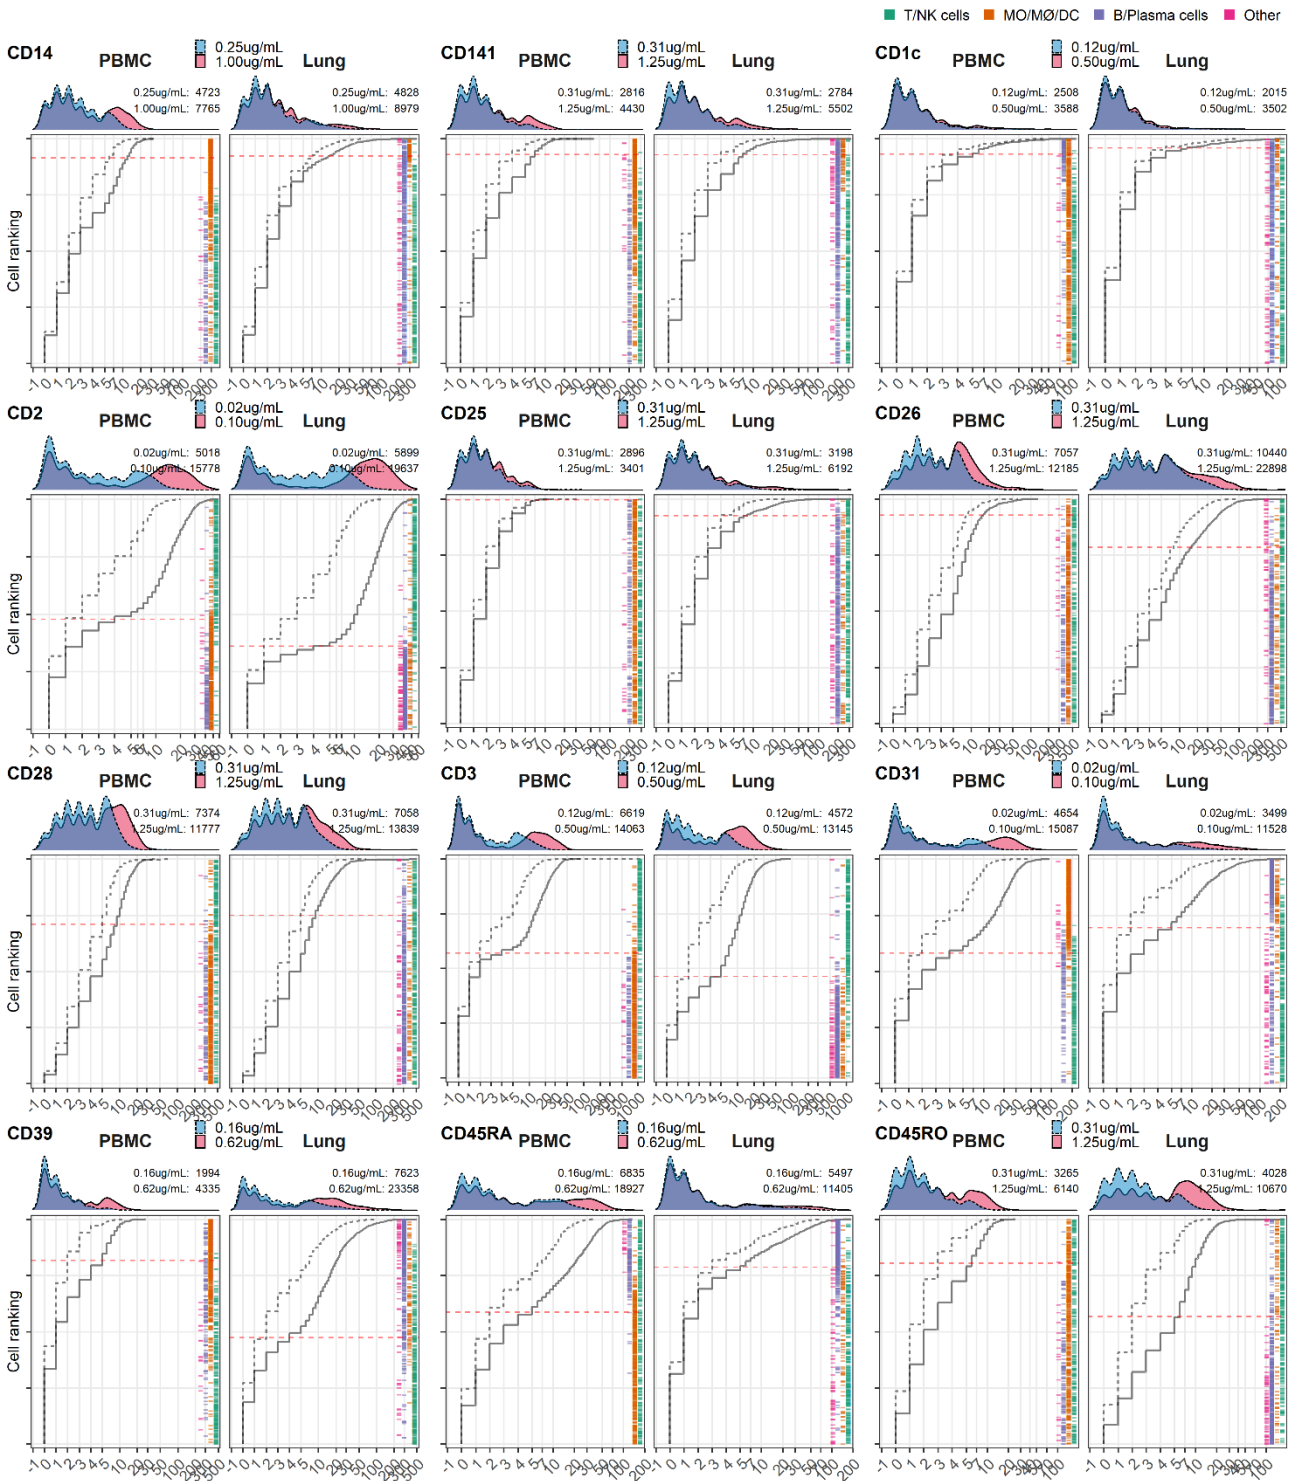



## Supplementary Figure S2D: Category D

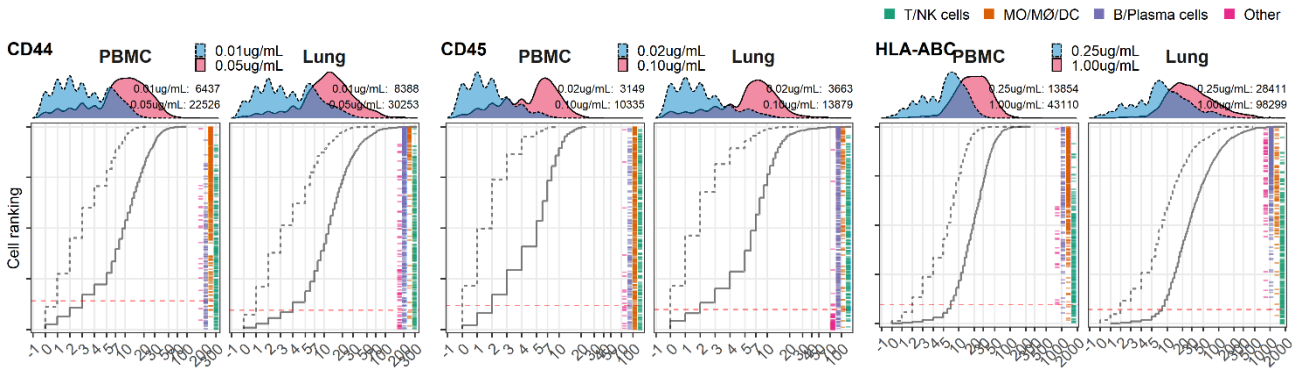

## Supplementary Figure S2E: Category E

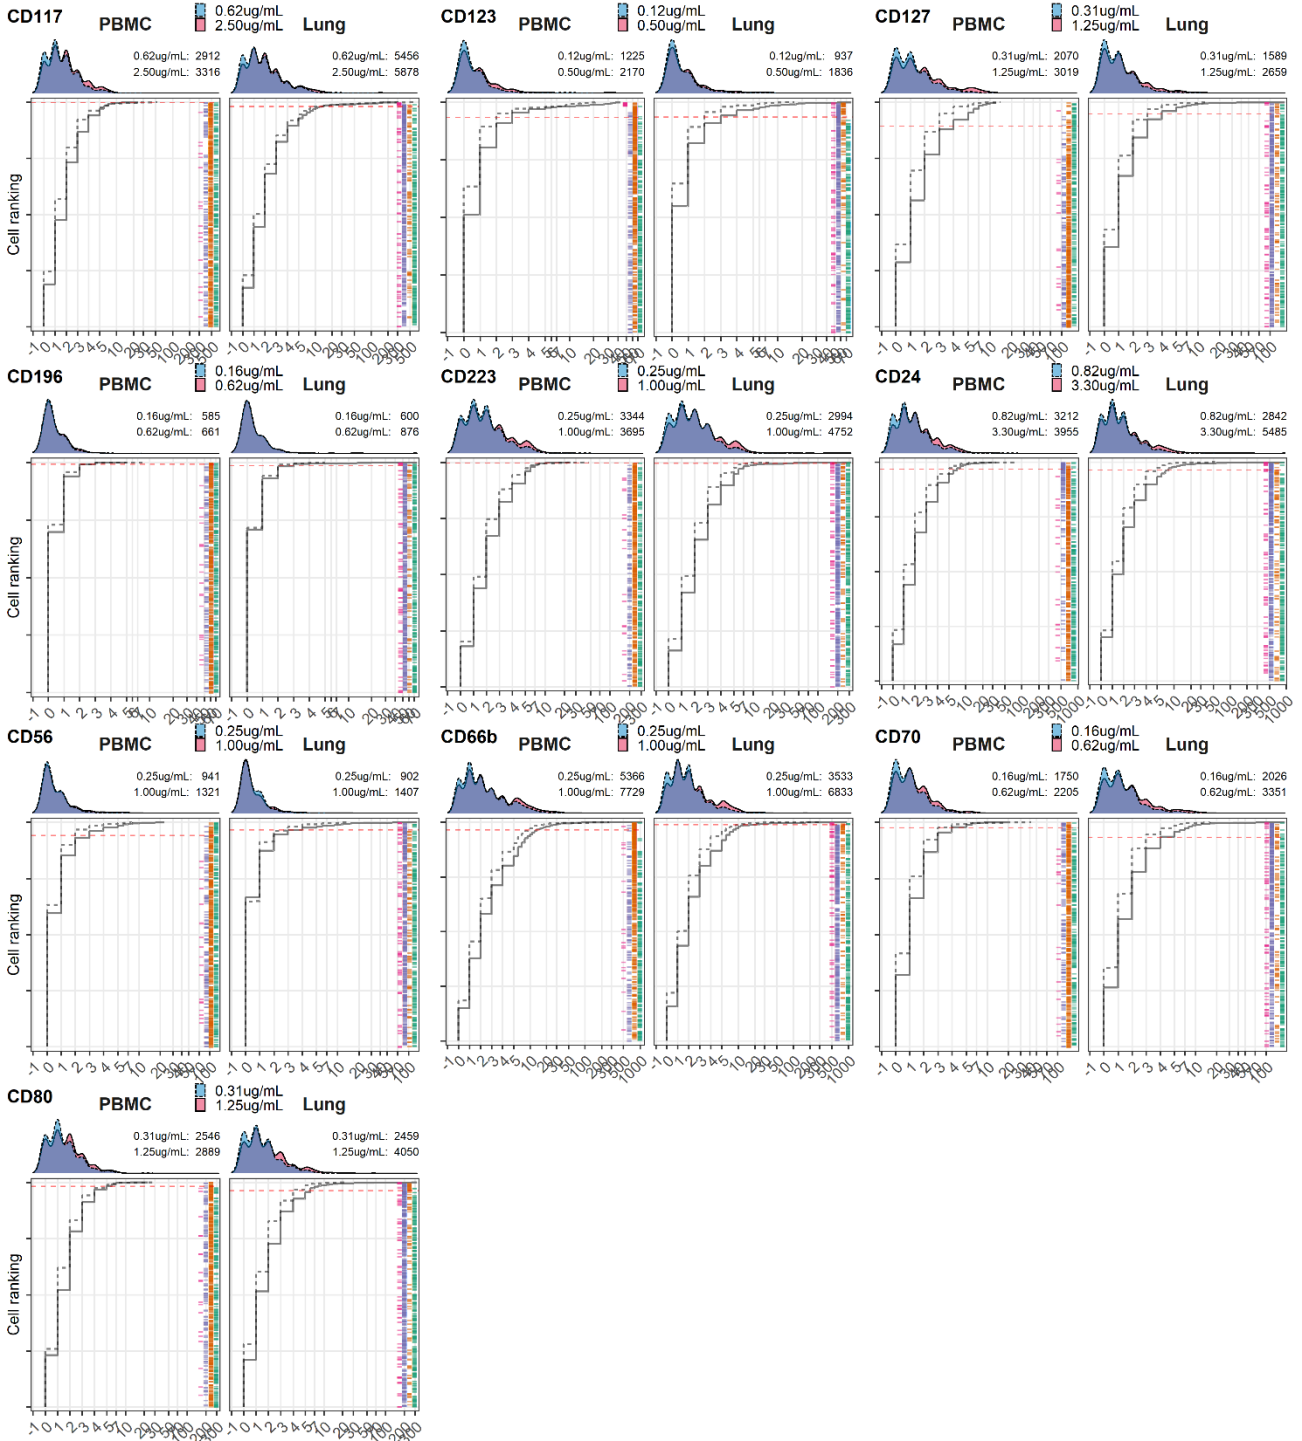

**Supplementary Figure S2: Response of individual antibodies to four-fold reduction in concentration in PBMCs and Lung tumor immune cells.**

“Titration plots” (Marker UMI count vs. Normalized cell rank) for response to reduction in antibody concentration from dilution factor 1 (DF1; solid line) to DF4 (dashed line). Histogram depicts distribution of UMIs at each condition. Numbers in histograms denote total UMI count within cell-containing droplets at each condition. “Barcode plot” to the right depicts cell type occurrence at the corresponding rank to visualize cell specificity of the antibody. Horizontal red lines depicts cell rank cutoff for “positive” cells (shown in Suppl. Fig S1).

# Supplementary Figure S3A

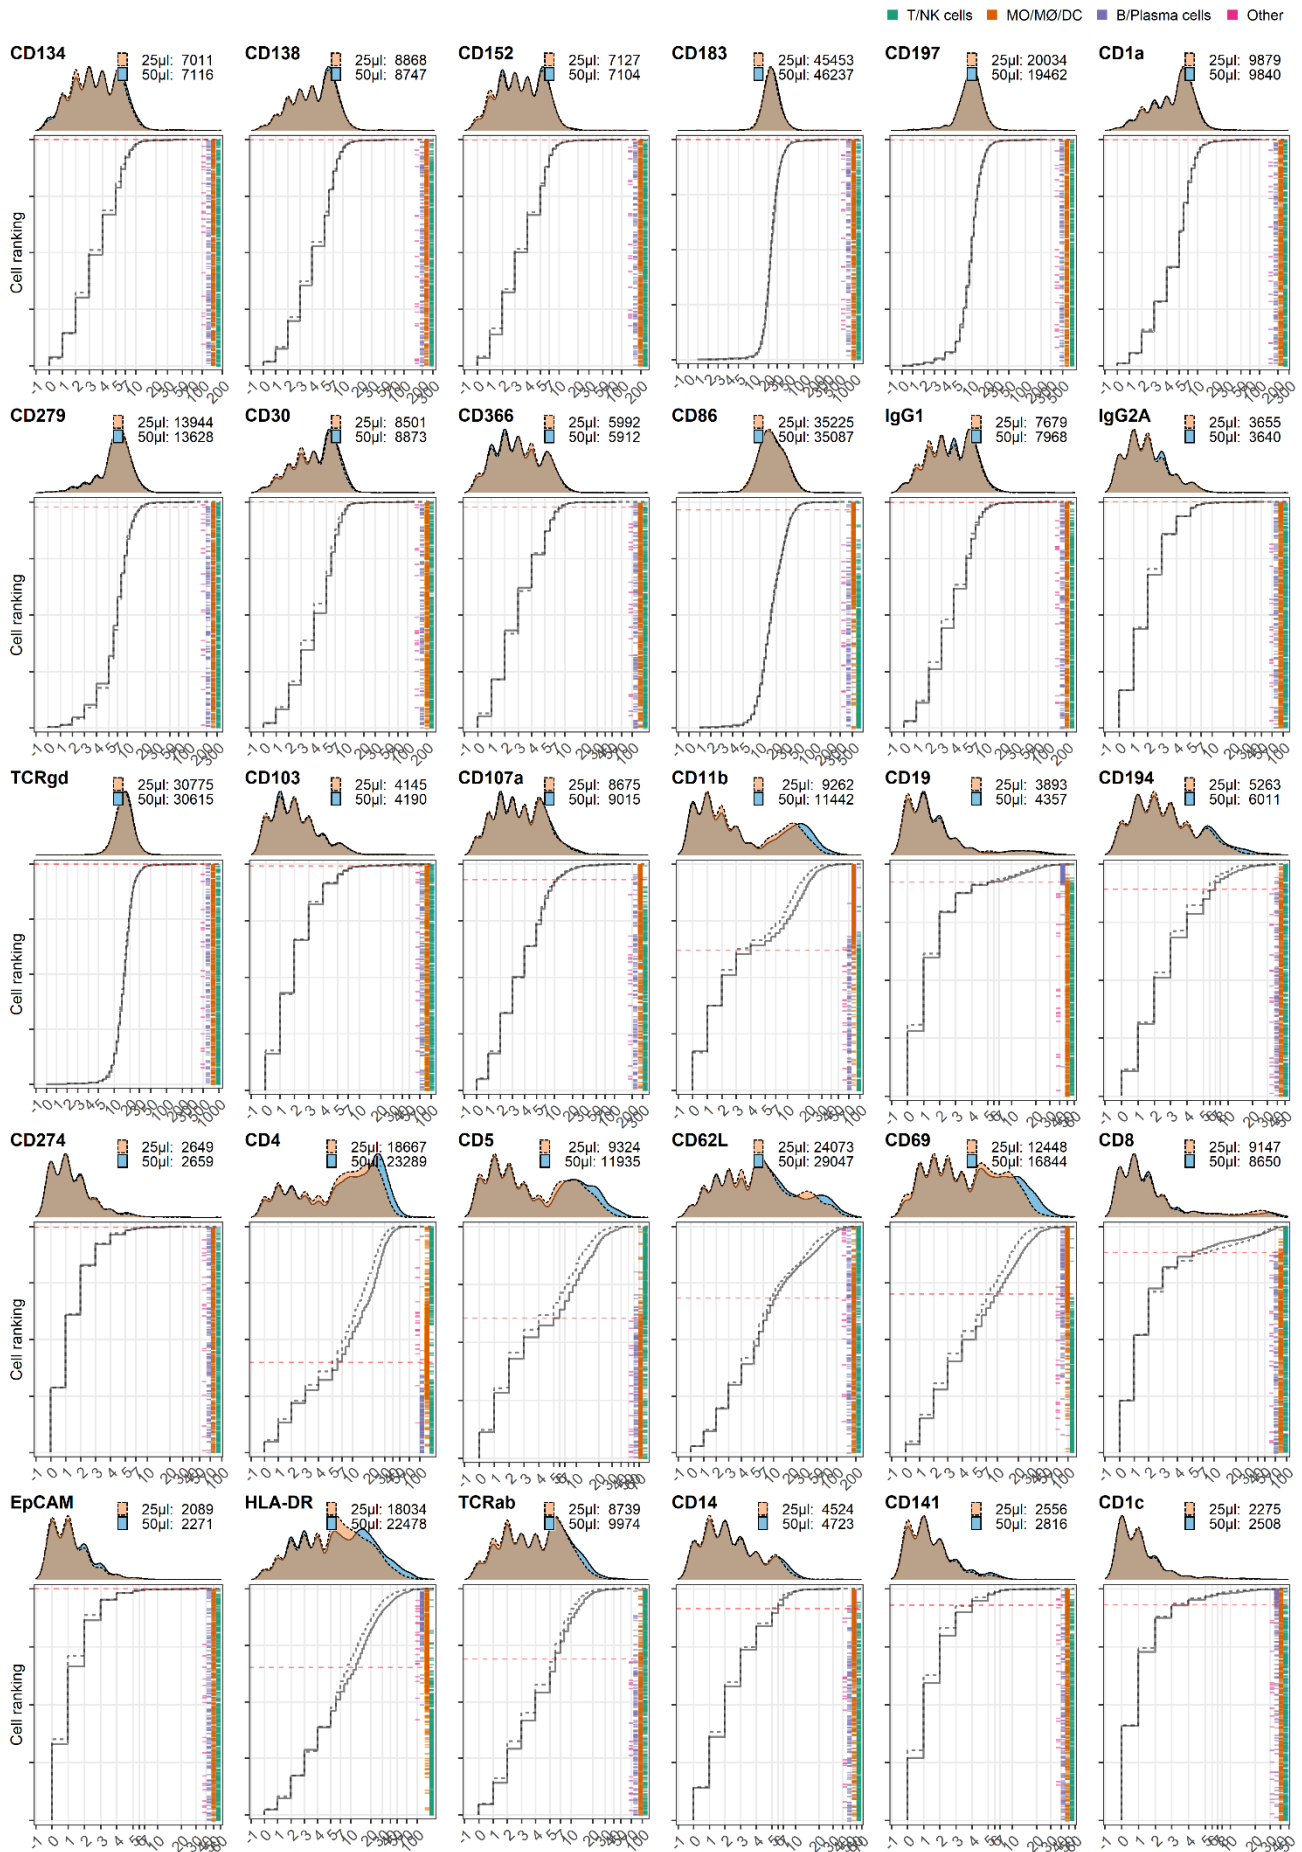

## Supplementary Figure S3B

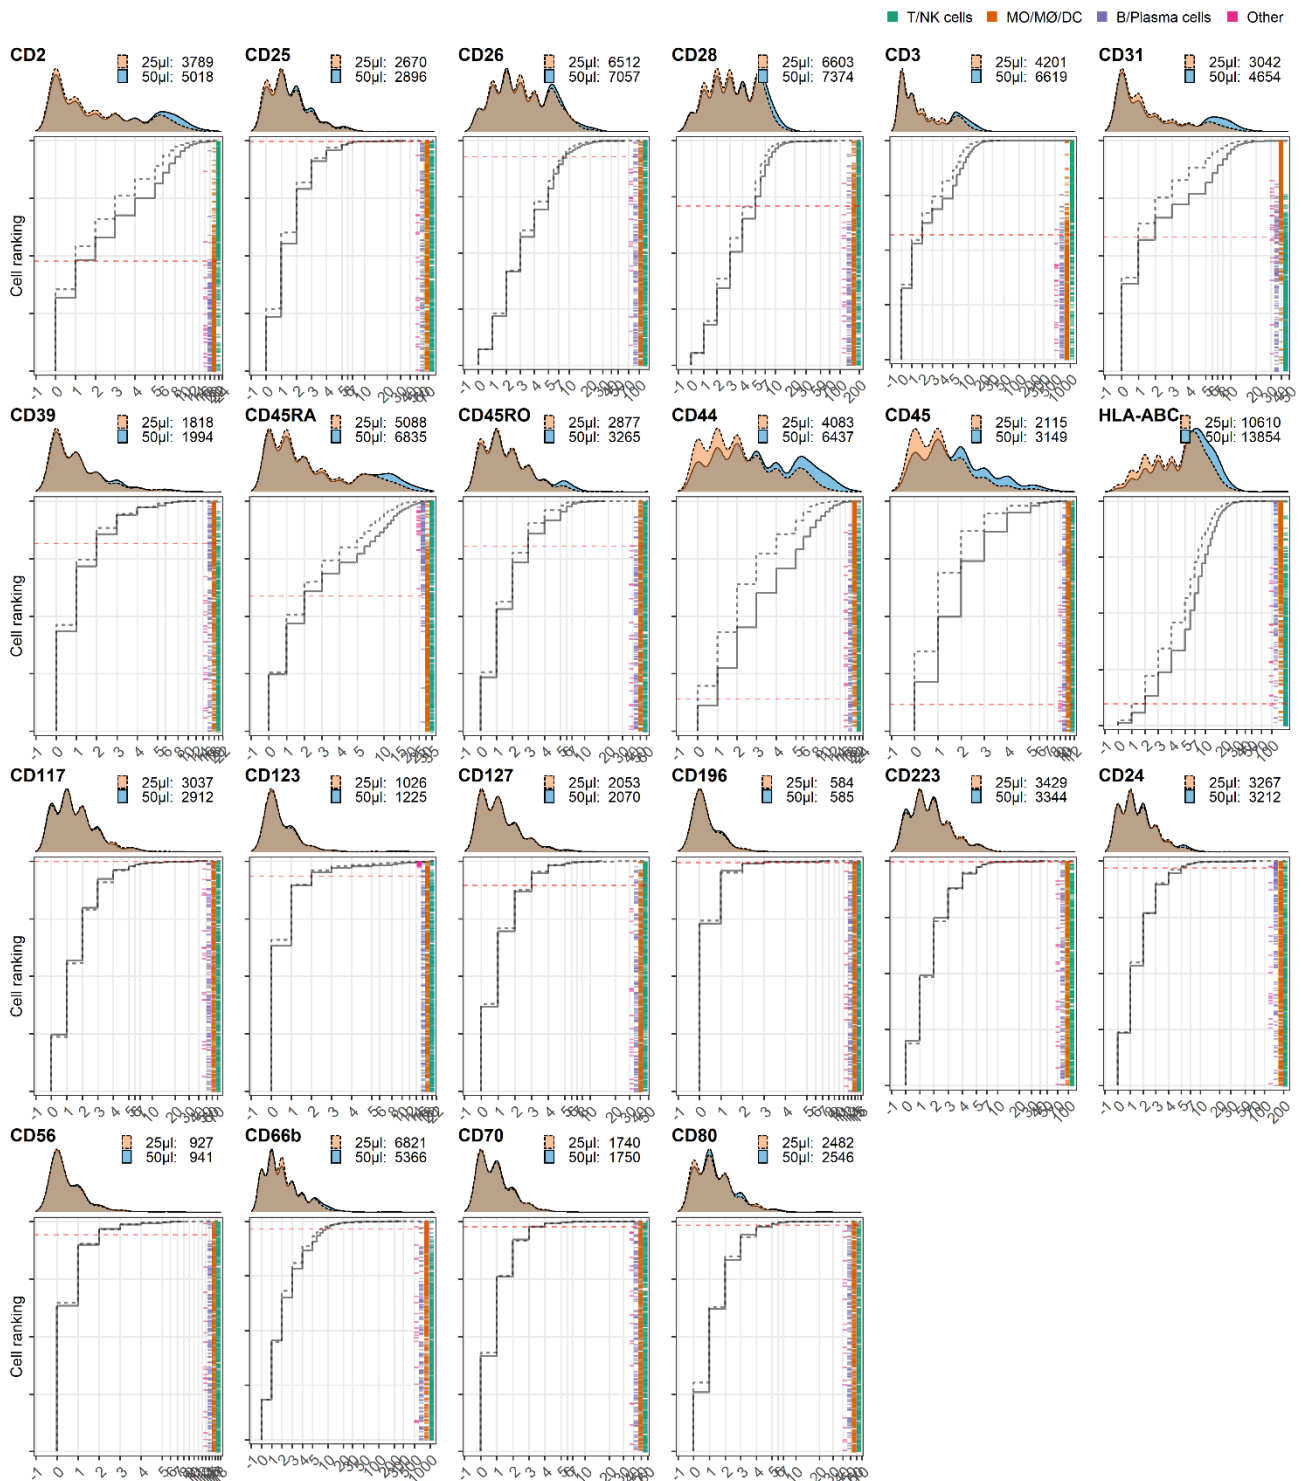

### Supplementary Figure S3: Response of individual antibodies to reduction in staining volume.

“Titration plots” (Marker UMI count vs. Normalized cell rank) for CD31 signal response to reduction in staining volume from 50 µl (solid line) to 25 µl (dashed line). Histogram depicts distribution of UMIs at each condition. “Barcode plot” to the right depict cell type occurrence at the corresponding rank to visualize cell specificity of the antibody. Numbers in legend denote total UMI count within cell-containing droplets from each sample.

# Supplementary Figure S4A

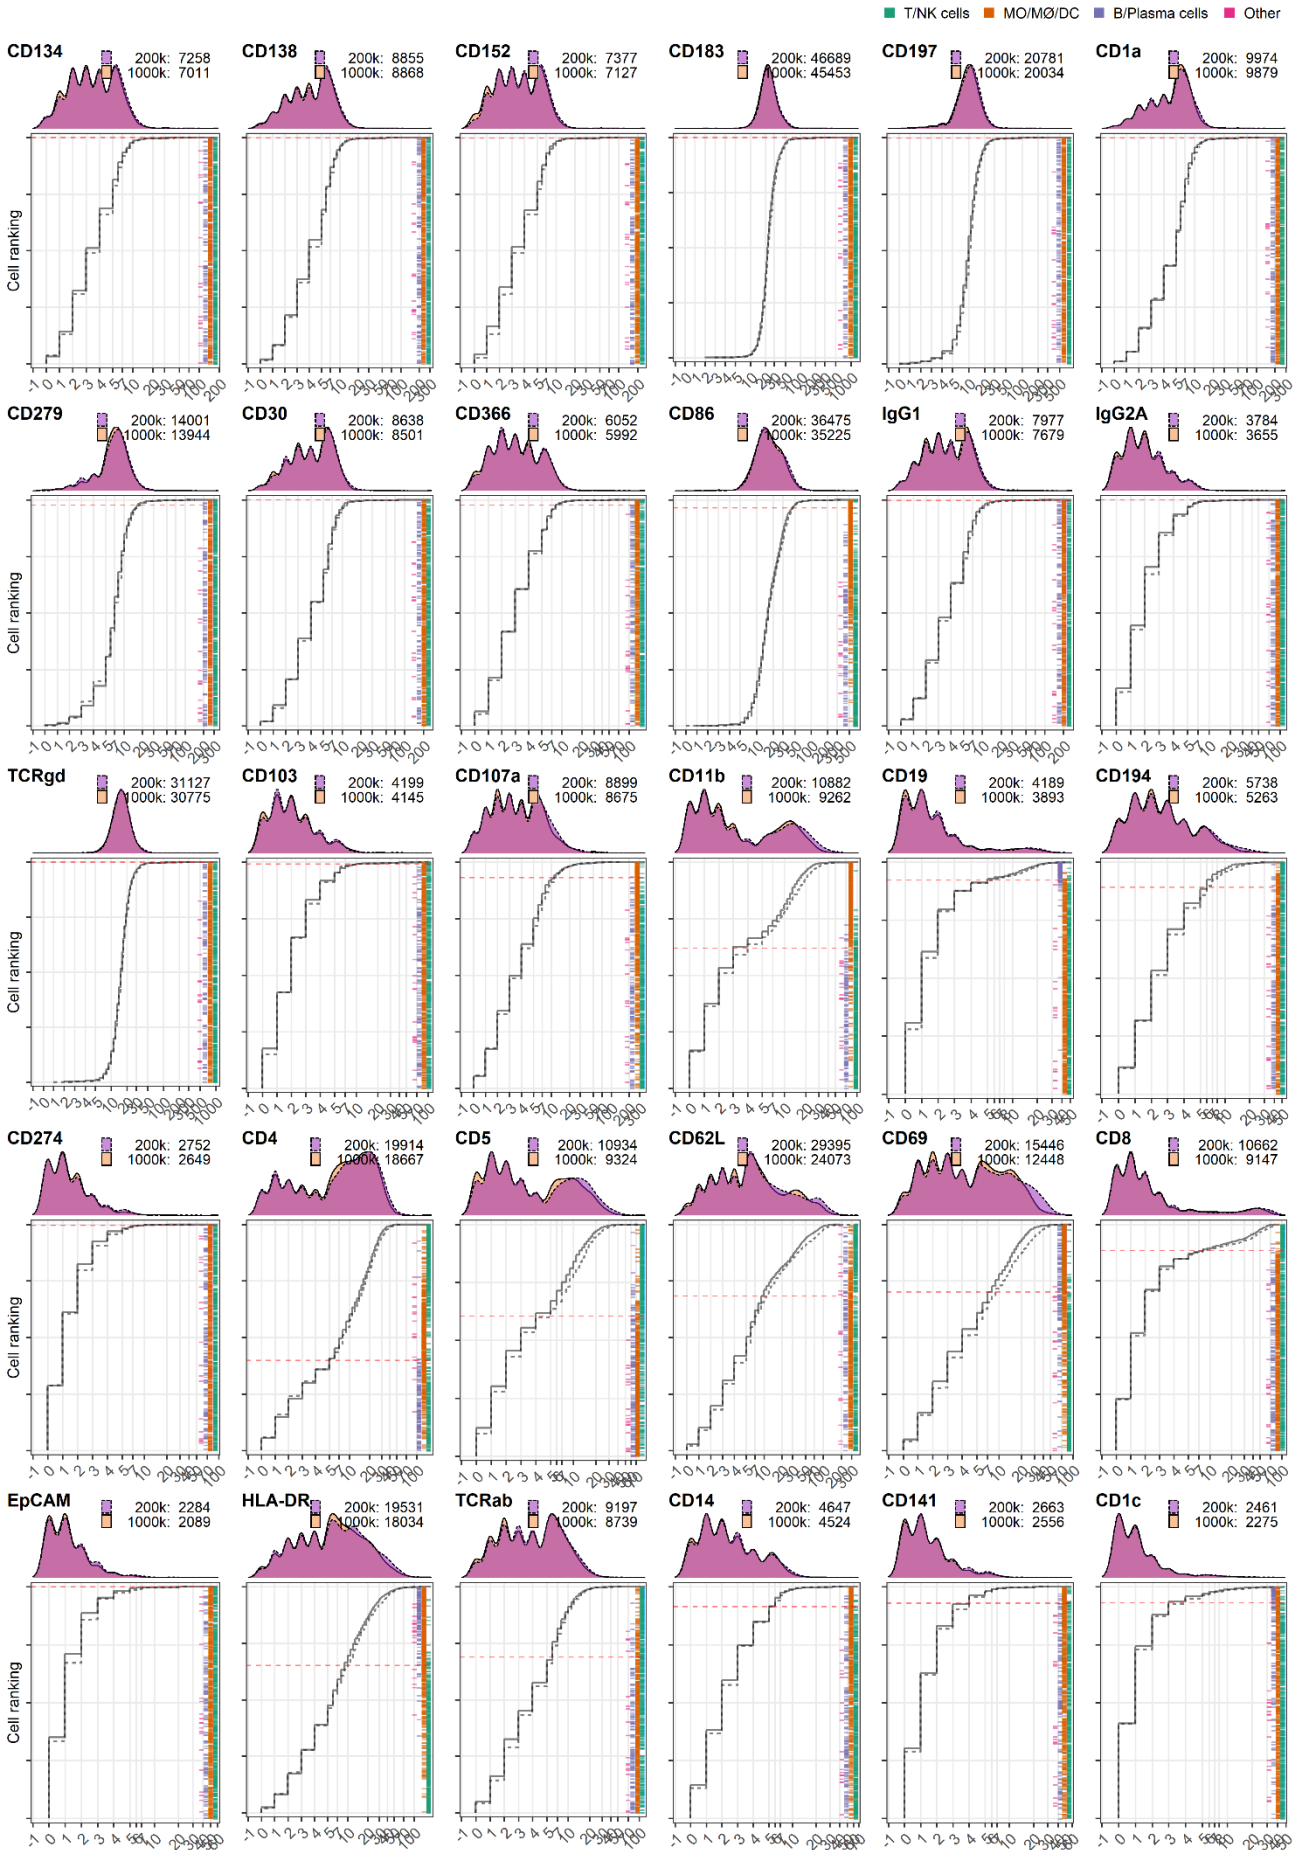



## Supplementary Figure S4B

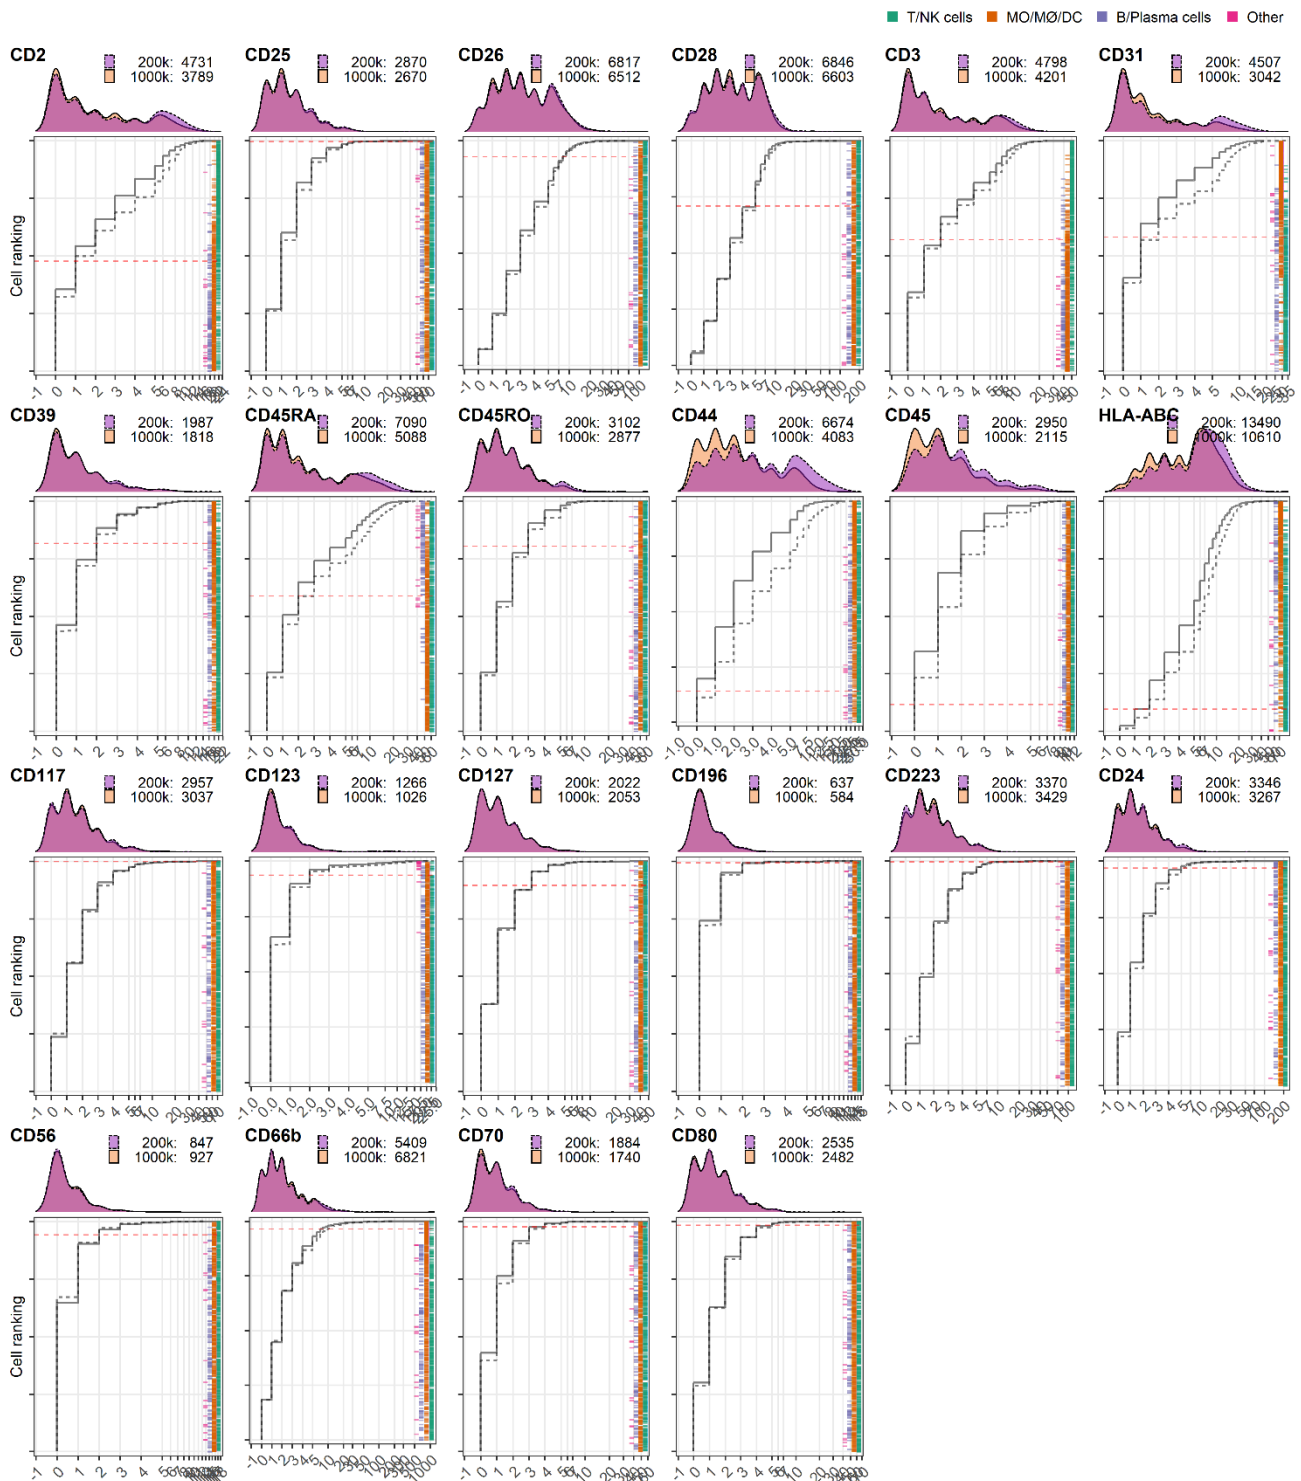

### Supplementary Figure S4: Response of individual antibodies to reduction in cell numbers at staining.

“Titration plots” (Marker UMI count vs. Normalized cell rank) for CD31 signal response to reduction in cell numbers at staining from  $1 \times 10^6$  (solid line) to  $0.2 \times 10^6$  cells (dashed line). Histogram depicts distribution of UMIs at each condition. “Barcode plot” to the right depict cell type occurrence at the corresponding rank to visualize cell specificity of the antibody. Numbers in legend denote total UMI count within cell-containing droplets from each sample.

## Supplementary Figure S5

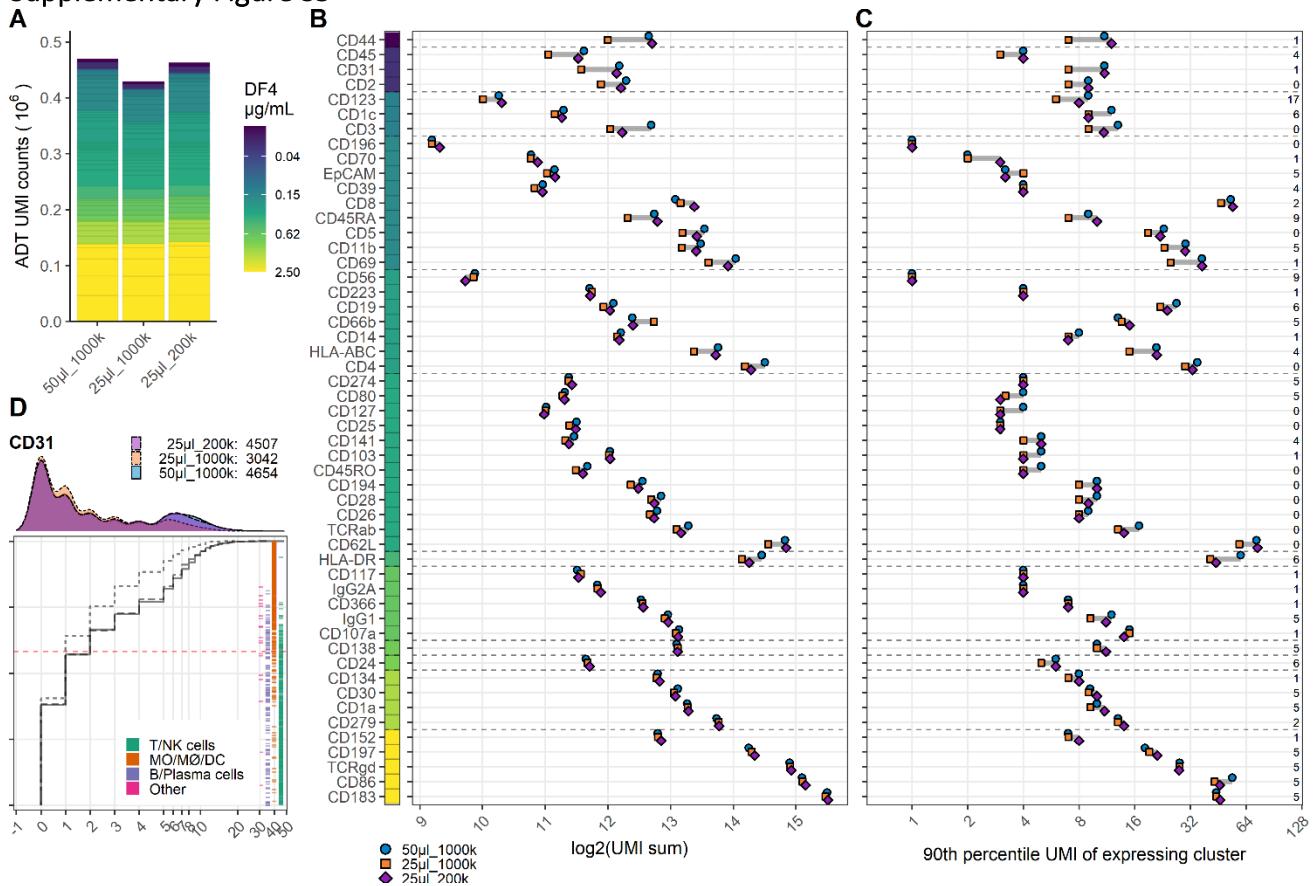

### Supplementary Figure S5: 5-fold reduction in cell density mitigates but does not supersede 2-fold reduction in staining volume.

Comparison of PBMC samples stained in 50 $\mu\text{l}$ , 25 $\mu\text{l}$  and 25 $\mu\text{l}$  antibody staining solution at dilution factor 4 (DF4) at cell densities:  $1 \times 10^6$  (50 $\mu\text{l}$ \_1000k),  $1 \times 10^6$  (25 $\mu\text{l}$ \_1000k) or  $0.2 \times 10^6$  (25 $\mu\text{l}$ \_200k) cells, respectively. **A**. Summarized UMI counts within cell-containing droplets segmented by the individual antibodies colored by their concentration. **B, C**. ADT signal for each antibody at each condition. Individual antibodies are colored by their concentration. Quantified by **(B)** sum of UMIs within cell-containing droplets assigned to each antibody and **(C)** 90<sup>th</sup> percentile UMI count within cell cluster with most abundant expression (the assayed cluster is annotated by numbers inside the). **D**. "Titration plot" (Marker UMI count vs. Normalized cell rank) for CD31 signal at the three conditions. Histogram depicts distribution of UMIs at each condition. "Barcode" to the right depict cell type occurrence at the corresponding rank to visualize cell specificity of the antibody. Numbers in legend denote total UMI count assigned to CD31 within cell-containing droplets from each sample.

### Supplementary Figure S6

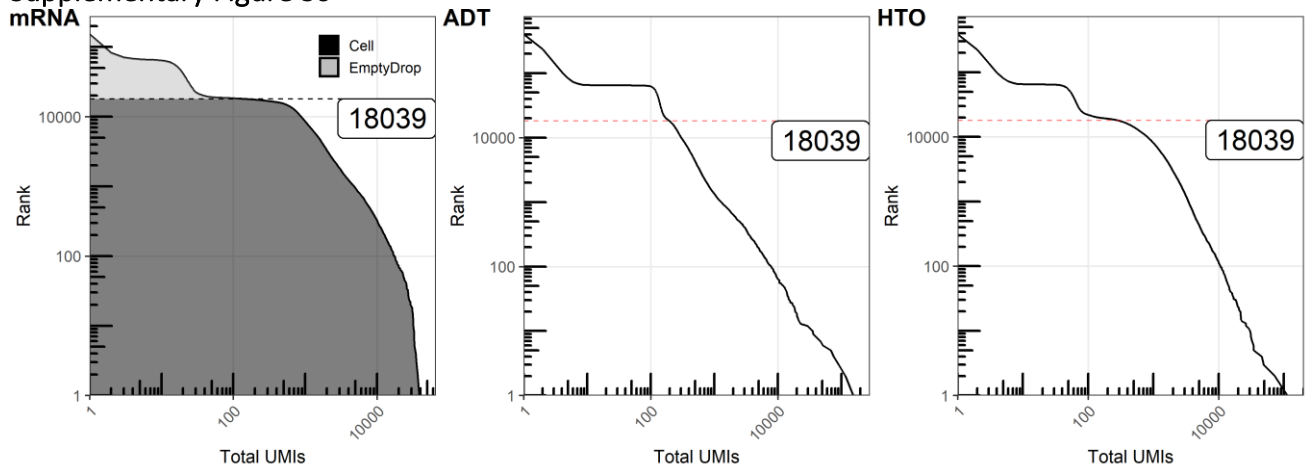

### Supplementary Figure S6: Quantifying UMIs within cells and empty droplets of ADT and HTO.

“Knee plots” (Barcode rank vs. Total UMIs within barcode) for mRNA, antibody-derived tag (ADT) and hashtag-oligo (HTO) libraries. Cell-containing droplets were filtered based on the total UMI count at the inflection point in the mRNA plot. Red lines depict the position of rank 18039, largely corresponding to the cutoff for cell-containing droplets.

## Supplementary Figure S7

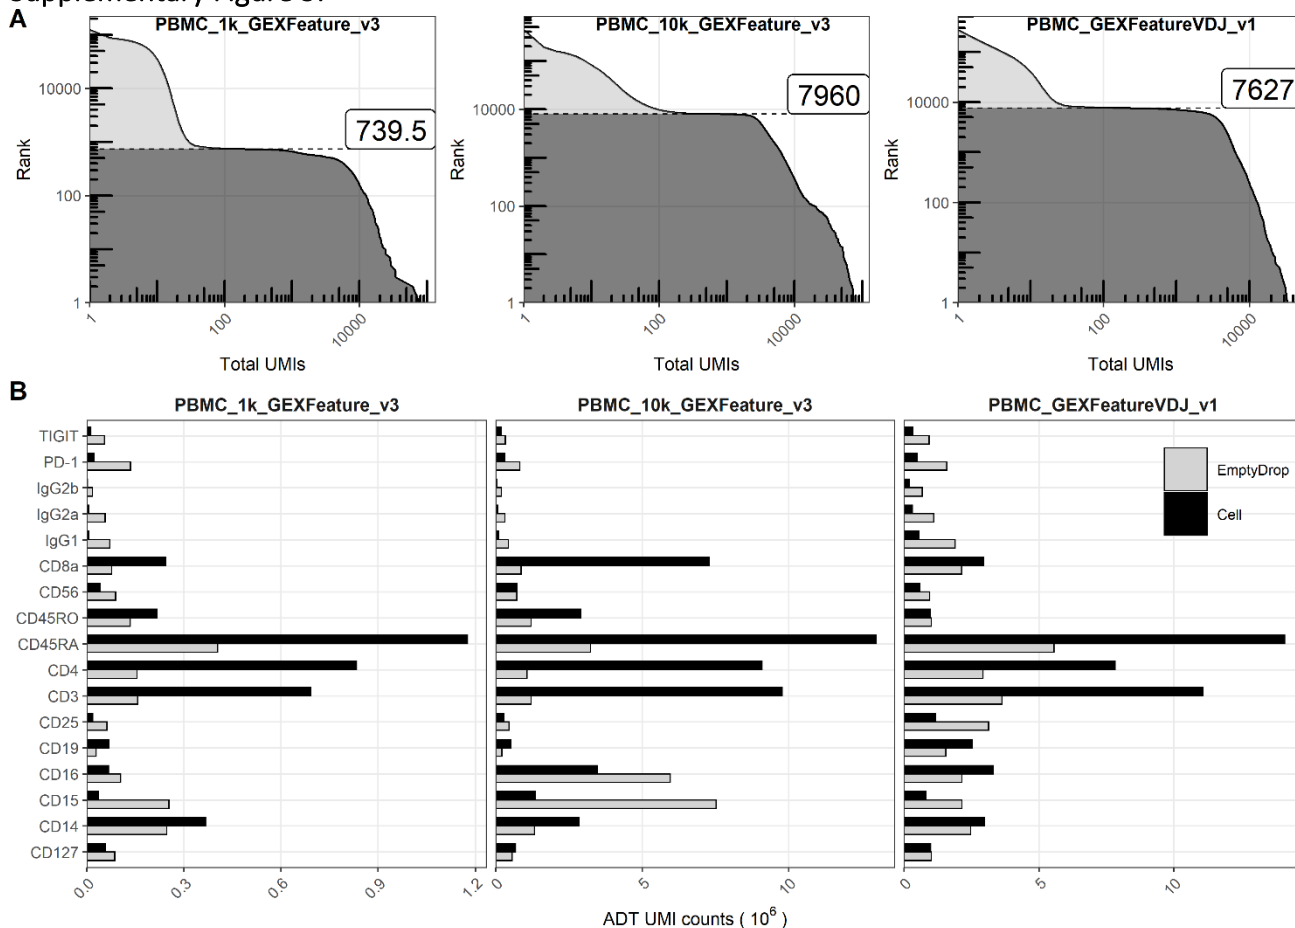

### Supplementary Figure S7: Quantifying UMIs within cells-containing and empty droplets from public 10X datasets.

**A.** “Knee plots” (Barcode rank vs. Total UMIs within barcode) for mRNA libraries within three publicly available single-cell RNA sequencing runs (from the 10X Genomics website) showing filtering of cell-containing and empty droplets based on the total UMI count at the inflection point. **B.** Total UMI counts for the individual antibodies from each of the antibody-derived tag (ADT) libraries within cell-containing and empty droplets.

# Supplementary Figure S8A

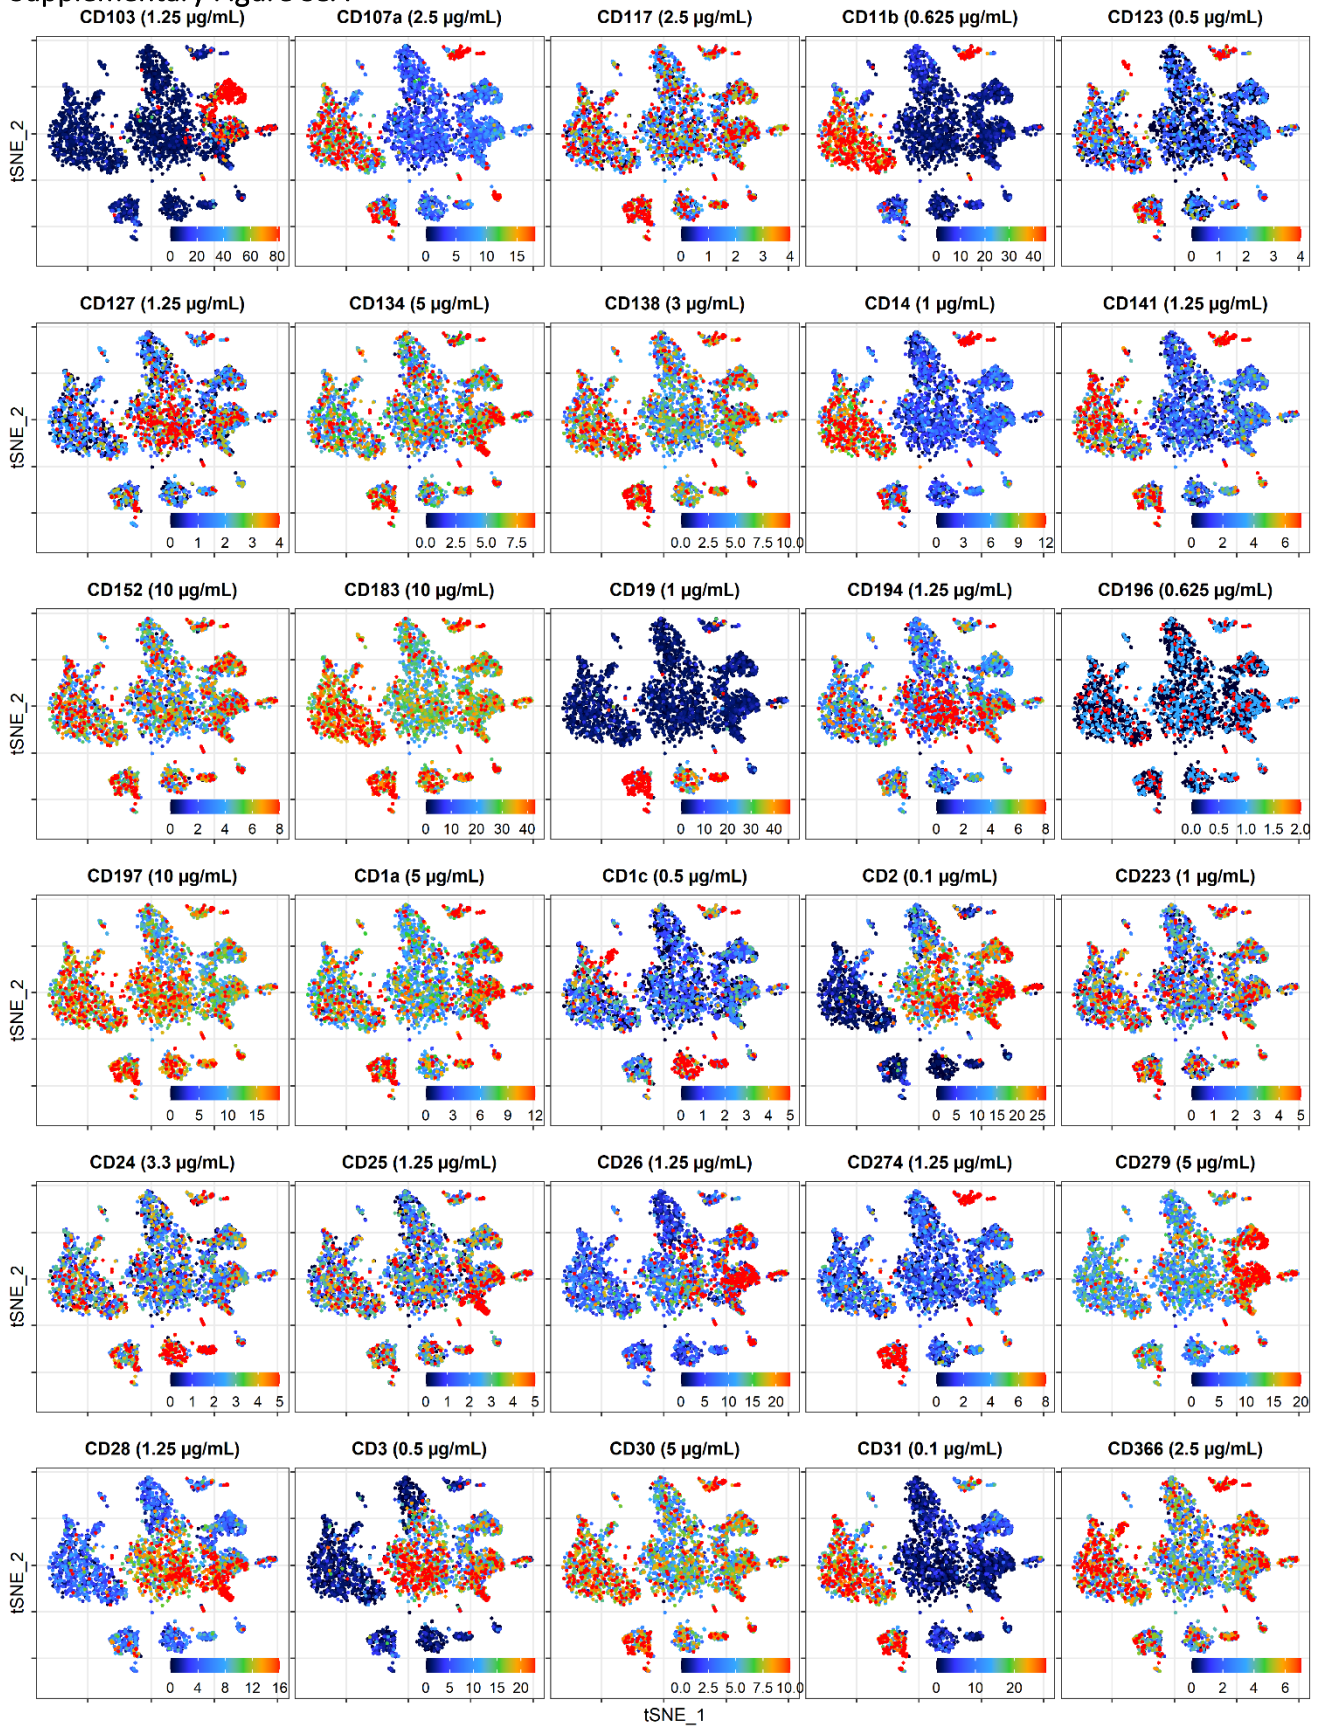



## Supplementary Figure S8B

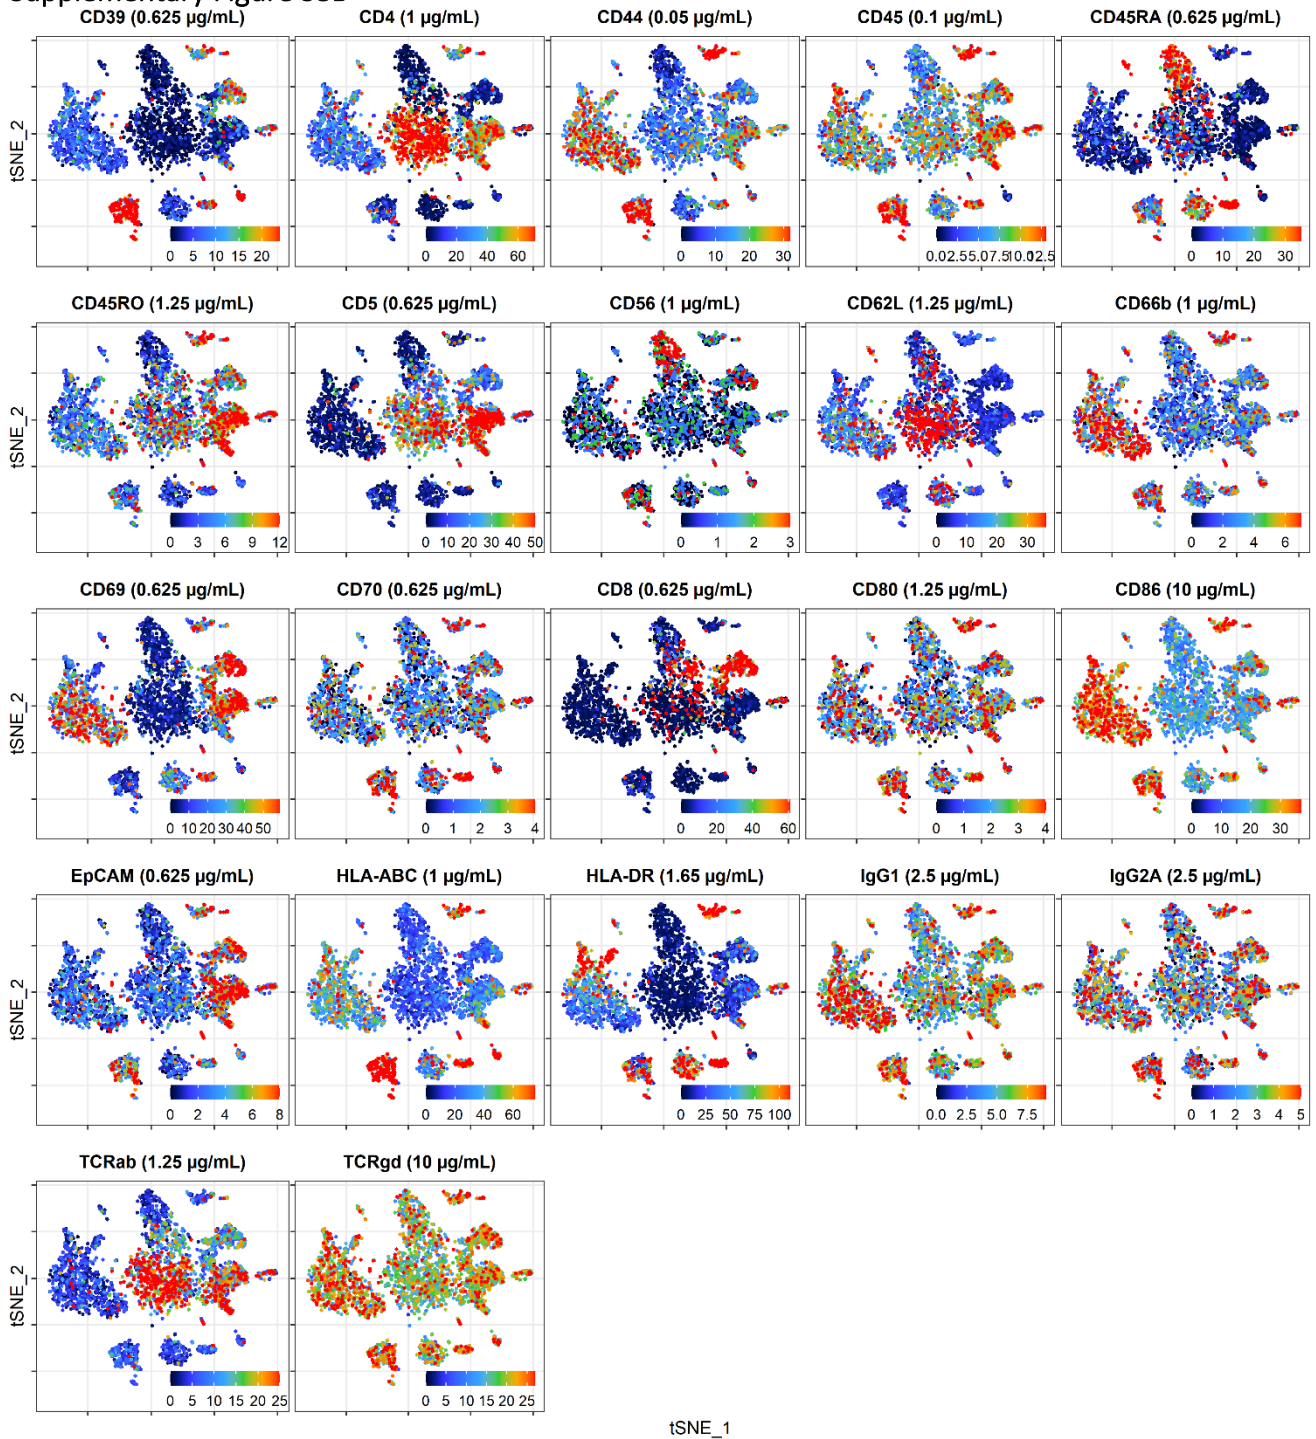

### Supplementary Figure S8: Cellular distribution of raw UMI counts

tSNE plots displaying raw (unnormalized) UMI counts from the cells stained at dilution factor 1 (DF1) for each antibody. To make the color scale less sensitive to outliers, we set upper threshold at the 90% percentile.

# Supplementary Figure S9

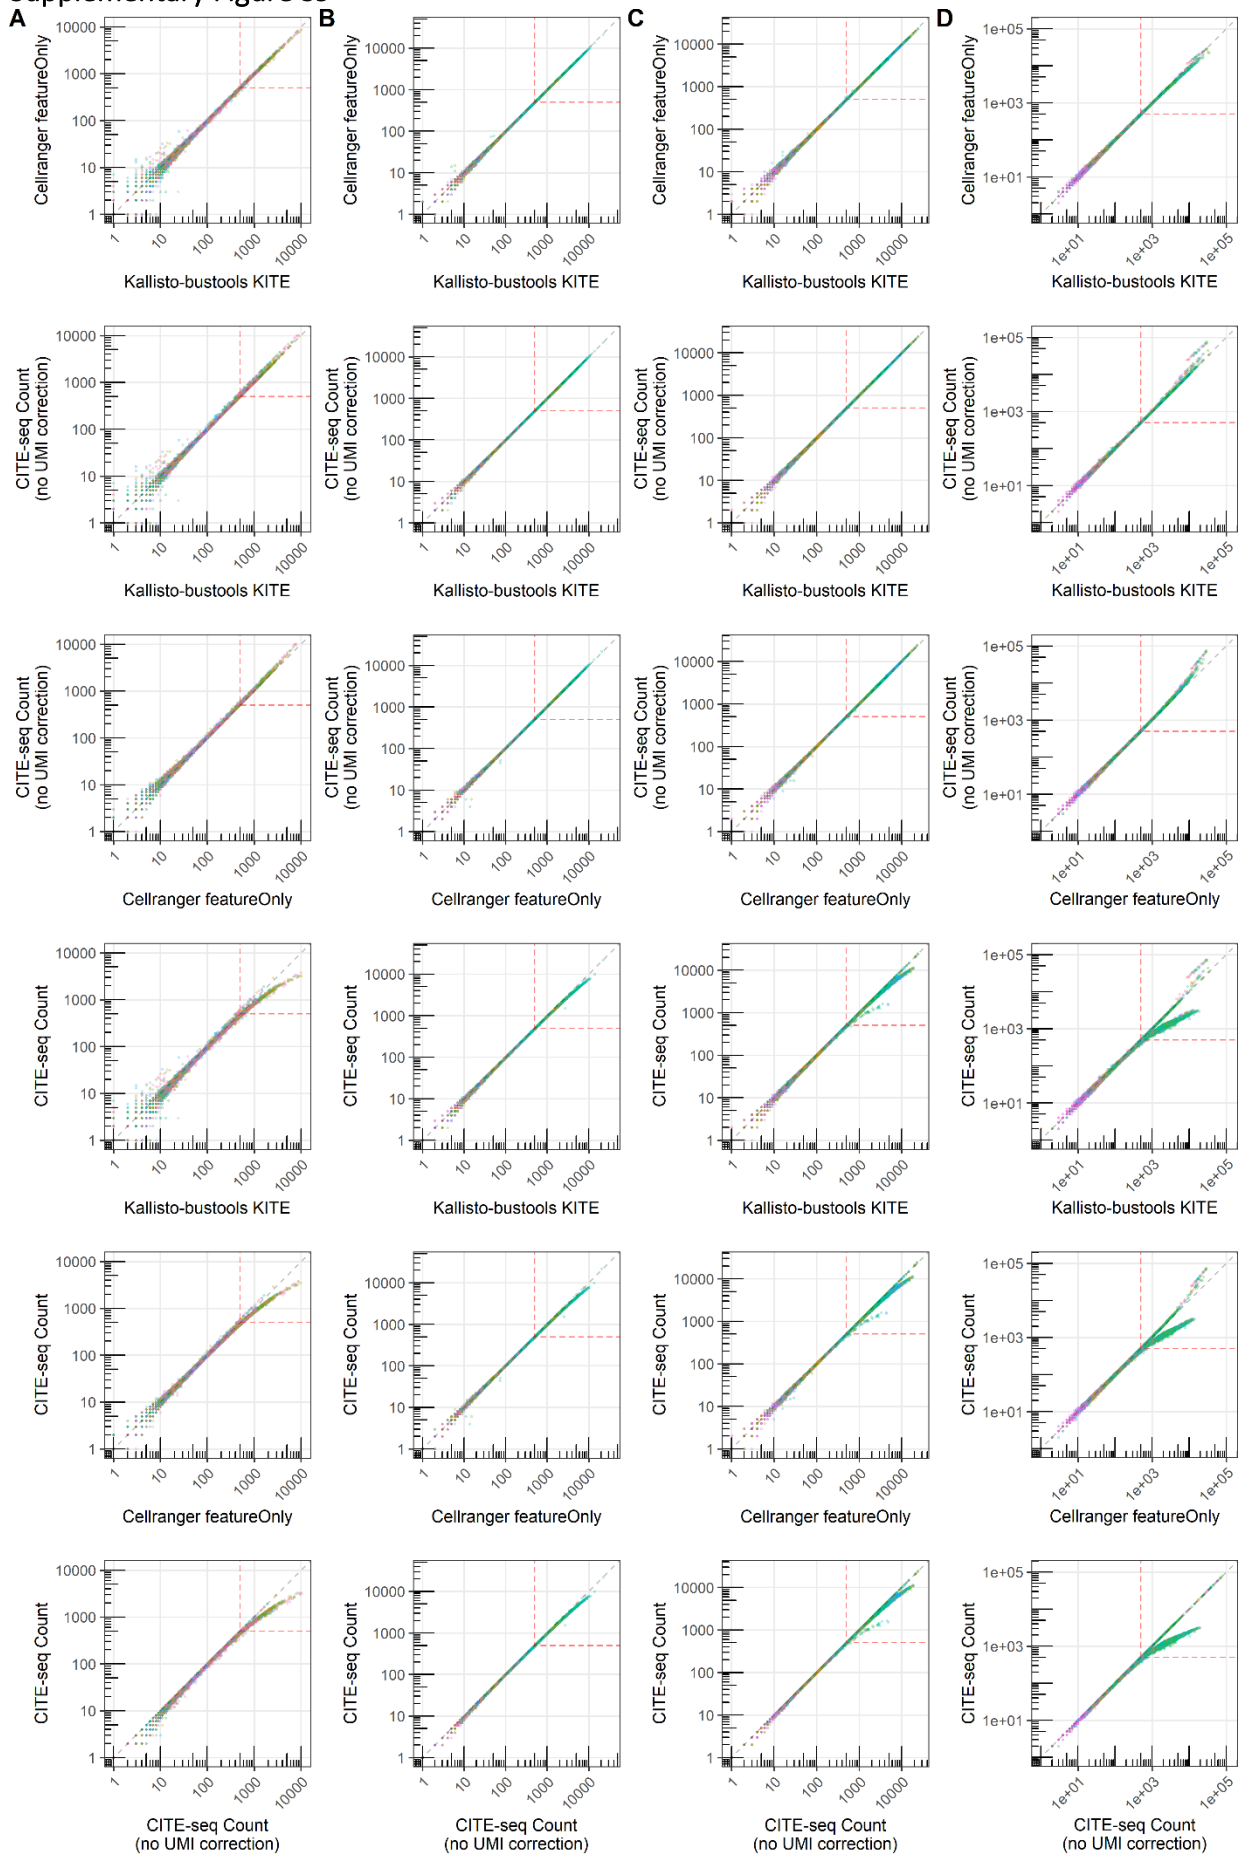

**Supplementary Figure S9: UMI counts per marker per cell across counting methods.**

Pair-wise concordance of UMI count per antibody per cell-containing droplet across (A) ADT library as well as publicly available 10X Genomics datasets: (B) PBMC\_1k\_GEXFeature\_v3, (C) PBMC\_10k\_GEXFeature\_v3 and (D) PBMC\_GEXFeatureVDJ\_v1. Dots are colored by antibody.
